1 **The discovery of gene mutations making SARS-CoV-2**  
2 **well adapted for humans: host-genome similarity**  
3 **analysis of 2594 genomes from China, the USA and**  
4 **Europe**

5

6 Weitao Sun<sup>1,2\*&</sup>

7 <sup>1</sup>School of Aerospace Engineering, Tsinghua University, Beijing, 100084, China

8 <sup>2</sup>Zhou Pei-Yuan Center for Applied Mathematics, Tsinghua University, Beijing, 100084, China

9

10 **\* Corresponding author**

11 **Email:** [sunw@tsinghua.edu.cn](mailto:sunw@tsinghua.edu.cn)

12

13 **Short title**

14 Discovery of SARS-CoV-2 gene mutations by host-genome similarity analysis

15

16

17 <sup>&</sup>The author contributed equally to this work.

18

## 19 **Abstract**

20 Severe acute respiratory syndrome coronavirus 2 (SARS-CoV-2), a positive-sense single-stranded virus  
21 approximately 30 kb in length, causes the ongoing novel coronavirus disease-2019 (COVID-19). Studies  
22 confirmed significant genome differences between SARS-CoV-2 and SARS-CoV, suggesting that the  
23 distinctions in pathogenicity might be related to genomic diversity. However, the relationship between  
24 genomic differences and SARS-CoV-2 fitness has not been fully explained, especially for open reading frame  
25 (ORF)-encoded accessory proteins. RNA viruses have a high mutation rate, but how SARS-CoV-2 mutations  
26 accelerate adaptation is not clear. This study shows that the host-genome similarity (HGS) of SARS-CoV-2  
27 is significantly higher than that of SARS-CoV, especially in the ORF6 and ORF8 genes encoding proteins  
28 antagonizing innate immunity *in vivo*. A power law relationship was discovered between the HGS of ORF3b,  
29 ORF6, and N and the expression of interferon (IFN)-sensitive response element (ISRE)-containing  
30 promoters. This finding implies that high HGS of SARS-CoV-2 genome may further inhibit IFN I synthesis  
31 and cause delayed host innate immunity. An ORF1ab mutation, 10818G>T, which occurred in virus  
32 populations with high HGS but rarely in low-HGS populations, was identified in 2594 genomes with  
33 geolocations of China, the USA and Europe. The 10818G>T caused the amino acid mutation M37F in the  
34 transmembrane protein nsp6. The results suggest that the ORF6 and ORF8 genes and the mutation M37F  
35 may play important roles in causing COVID-19. The findings demonstrate that HGS analysis is a promising  
36 way to identify important genes and mutations in adaptive strains, which may help in searching potential  
37 targets for pharmaceutical agents.

## 38 **Introduction**

39 In December 2019, a novel coronavirus SARS-CoV-2 was reported as the cause of COVID-19. SARS-CoV-2  
40 has a positive-sense single-stranded RNA with a length of approximately 30 kb[1]. Studies have shown that  
41 considerable genetic diversity exists between SARS-CoV-2 and SARS-CoV[1, 2]. Compared with SARS-

42 CoV, SARS-CoV-2 appears to be more contagious and more adapted to humans[3]. The distinctions in  
43 pathogenicity and virulence might be related to genomic diversity.

44 RNA viruses are susceptible to genetic recombination, and viral populations may evolve improved  
45 adaptability in the process of infecting hosts. By comparing the genome similarity of the virus to the host,  
46 the adaptability of the virus to the host can be inferred. Although the genomes of viruses and hosts are quite  
47 different in general, nucleotide sequence similarities do exist. Such similarities may have three biological  
48 significances. (1) These similar fragments come from a common ancestor and remain stable over long-term  
49 evolution due to their biological significance. (2) Similar genomic fragments are coincidentally preserved in  
50 both viruses and hosts over time because of the biological benefits of the gene products. (3) When the virus  
51 interacts with the hosts, mutants are created by virus-host gene exchanges, causing genome similarities.

52 A growing number of studies on virus-host gene similarity have been reported. Simian virus 40 (SV40), the  
53 first animal virus to undergo complete full-sequence DNA analysis, can infect monkeys and humans and  
54 cause tumors[4]. Rosenberg et al.[5] found that some mutant SV40 viruses contained nucleic acid sequences  
55 from their host monkeys. This finding suggests that viruses can recombine with host genes to complete their  
56 own physiological processes, which makes up for a lack of function or increases virulence. Genes similar to  
57 specific fragments of the human genome in molluscum contagiosum virus (MCV) have been reported[6].  
58 MCV is a human poxvirus and lacks the genes associated with virus-host interactions in other poxvirus  
59 species (variola virus). However, genes in MCV with high similarity to specific fragments of the human  
60 genome are also hard to find in other poxviruses. These host-like genes may provide MCV-specific strategies  
61 for coexistence with the host[6]. In other words, it is very likely that viruses use host-specific genes to perform  
62 activities related to virus-host interactions, such as evasion of the host innate immune system. When human  
63 peripheral blood DNA was used as a template for polymerase chain reaction (PCR), 5 of 6 samples could be  
64 amplified by Epstein-Barr virus (EBV)- or hepatitis C virus (HCV)-specific primers[7]. Therefore, it is  
65 speculated that some genes of the two viruses may also exist in the human genome or that the viruses may

66 have homology with human genes. This hypothesis implies that not only can the virus have the host's genes  
67 but also the host itself may have genes from the virus.

68 Selection pressure exerted by the host immune system plays an important role in shaping virus  
69 mutations. Homology between virus and host proteins indicates the presence of host gene capture.  
70 Evolution of viral genes may involve intergenome gene transfer and intragenome gene  
71 duplication[8]. By acquiring immune modulation genes from cells, viruses have evolved proteins  
72 that can regulate or inhibit the host's immune system[9, 10]. A recent study showed that human  
73 genome evolution was shaped by viral infections[11]. In mammals, nearly 30% of the adaptive  
74 amino acid changes in the human proteome are caused by viruses, suggesting that viruses are one  
75 of the major driving factors for the evolution of mammalian and human proteomes[12]. These  
76 findings support the possibility that SARS-CoV-2 may exchange genetic information with host  
77 cells. It can be inferred that most of the traits and mechanisms retained in "coevolution" between  
78 viruses and their hosts, including genetic and mutational mechanisms, benefit at least one or both.  
79 At the molecular level of evolution, the exchange of genetic information is necessary for virus-host  
80 mutual adaptation, leading to the similarity of nucleotide sequences.

81 It is interesting to study the relationship between gene similarities and viral  
82 transmission/pathological ability. The single-stranded RNA of coronavirus generally encodes three  
83 categories of proteins: (1) the replication proteins open reading frame (ORF)1a and ORF1ab; (2)  
84 the structural proteins S (spike), E (envelope), M (membrane) and N (nucleocapsid); and (3)  
85 accessory proteins with unknown homologues. The structural protein genes are organized as '-S-  
86 E-M-N-' in the SARS-CoV-2 genome, and accessory protein genes are distributed between S and  
87 E, M and N.

88 The accessory protein genes play a key role in inhibiting the innate immune response *in vivo* and  
89 are more susceptible than the other genes to species-specific mutations under the pressure of  
90 evolutionary selection. Once inside the cell, the virus immediately confronts other critical proteins  
91 known as host-restriction factors (HRFs)[13]. HRFs are proteins that recognize and block viral  
92 replication. Virus-host interactions control species specificity and viral infection ability. Under  
93 pressure from the host immune system, viruses must be able to overcome a range of constraints  
94 associated with the host species and often show evolutionary mutation selections. It is hypothesized  
95 that accessory ORFs may retain beneficial mutations to increase host-genome similarity (HGS).  
96 Identifying emerging genetic mutations in virus populations with high HGS may aid the  
97 understanding of how SARS-CoV-2 evolved adaptation to humans. To the best of our knowledge,  
98 studies on the genetic similarity between SARS-CoV-2 and the human genome have not been  
99 reported.

100 This study investigated the HGS of SARS-CoV-2 genes and elucidated the links between HGS and  
101 virus adaptation to humans. A power law relationship was discovered between the expression of  
102 genes with interferon (IFN)-stimulated response elements (ISREs) and HGS. ORFs with higher  
103 HGS suppressed the gene expression of ISRE-regulated genes to a greater extent. Applying HGS  
104 analysis to 2594 SARS-CoV-2 genomes from China, the USA and Europe, it was found that the  
105 ORF6 and ORF8 genes of SARS-CoV-2 had more significant HGS increments than SARS-CoV.  
106 In addition, three different sets of surviving mutations were identified in SARS-CoV-2 genomes  
107 for China, the USA and Europe. Interestingly, an ORF1ab mutation, 10818G>T, which resulted in  
108 the residue mutation M37F in the transmembrane protein nsp6, was observed in virus populations  
109 of all three regions. This mutation did not occur in strain populations with low HGS but gradually  
110 appeared in populations with high HGS. This finding provides strong evidence that SARS-CoV-2

111 may accelerate adaptation in humans through increasing HGS of the ORF6 and ORF8 genes and  
112 selecting the M37F mutation. However, the underlying mechanism by which these genes and  
113 mutations make SARS-CoV-2 more adapted to humans remains unclear.

## 114 **Materials and Methods**

### 115 **Viral genome data**

116 By using BLAST ORFfinder[14], 31 ORFs were detected in the RNA genome sequence (29903 nt) of SARS-  
117 CoV-2 (GenBank: MN908947.3). Only ATG was used as the ORF start codon, and nested ORFs were  
118 ignored. Among all the ORFs in the SARS-CoV-2 sequence, we selected the longest 14 as targets, whose  
119 lengths were no less than 75 nt. For genome comparison, ORFs in the SARS-CoV genome with a length of  
120 29728 nt (GenBank: AY394850.2) were also identified. There were 19 ORFs with lengths no less than 75 nt  
121 in the SARS-CoV sequence.

122 The SARS-CoV-2 genomes were obtained from the GISAID database[15]. By May 20, 2020, the GISAID  
123 database (<https://www.gisaid.org/>) had 416 SARS-CoV-2 genomes from China, 5184 genomes from the USA  
124 and 10954 genomes from Europe. Complete and high-coverage genomes were used to ensure accurate HGS  
125 calculations. The sequences containing nucleotide names other than A, G, C and T were removed from the  
126 dataset. In total, 2594 SARS-CoV-2 genomes were used in the current study, including 200 from China, 1538  
127 from the USA and 856 from Europe. The CDSs of the SARS-CoV-2 genome were identified by using  
128 MATLAB (<https://www.mathworks.com/help/bioinfo/ref/seqshoworfs.html>). The accession IDs of the  
129 genomes used in the article can be found in the Supplemental Information.

130 Human SARS-CoV genomes were collected from NCBI GenBank[16]. There were 25 CDSs of SARS-CoVs  
131 (full-length sequences only, with all ORF sequences, no nucleotide names other than A, G, C and T) at the  
132 time of article preparation. The accession IDs of these viral sequences can be found in the Supplemental  
133 Information.

## 134 **Host-genome similarity (HGS)**

135 The target CDSs were aligned with the human genome (*Homo sapiens* GRCh38.p12 chromosomes) by  
136 Blastn[17] to obtain matching fragments. Blastn sequence alignment gives an original score of  $S$ . To facilitate  
137 the comparison of Blast results among different subgenomic groups, the original score is standardized to  $S'$   
138 by Blastn:

$$139 \quad S' = \frac{\lambda S - \ln K}{\ln 2}, \quad (1)$$

$$140 \quad E = mn2^{-S'}. \quad (2)$$

141 Here, the  $E$  value represents the expected number of times when two random sequences of length  $m$  and  $n$   
142 are matched and the score is not lower than  $S'$ . Parameters  $K$  and  $\lambda$  describe the statistical significance of the  
143 results[18]. Assuming that the fragment of length  $a$  matches perfectly in the two random sequences, one has  
144 the following formula:

$$145 \quad E = (m - a)(n - a)4^{-a}. \quad (3)$$

146 Since the viral genome is quite different from the human genome, matching fragments are usually very short.  
147 When  $a$  is particularly small compared to  $m$  and  $n$ ,  $a = S'/2$  is obtained by combining Equation (3) and  
148 Equation (4). Thus, HGS is defined as

$$149 \quad H = \frac{\sum a}{n} = \frac{\sum S'}{2n}, \quad (4)$$

150 where  $n$  represents the length of the target sequence. The meaning of  $H$  is the ratio of the number of  
151 matched base pairs to the total length of the sequence when the matched sequences are converted into  
152 sequences of the same length.

## 153 **Data availability**

154 The SARS-CoV-2 genomes used in this study can be obtained at GISAID website (<https://www.gisaid.org/>).  
155 The SARS-CoV genomes can be obtained at NCBI database (<https://www.ncbi.nlm.nih.gov/>). The accession  
156 number and corresponding HGS of 2594 SARS-CoV-2 genomes and those of 25 SARS-CoV genomes are  
157 in Supplemental Information. The code for HGS calculation is available in GitHub  
158 (<https://github.com/WeitaoNSun/HGS>).

## 159 **Results**

### 160 **SARS-CoV-2 ORFs have higher HGS than those of SARS-CoV**

161 The SARS-CoV-2 (GenBank: MN908947.3) and SARS-CoV (GenBank: AY394850.2) RNA sequences  
162 were used as references to establish the genome organization. SARS-CoV-2 has 14 5'-ORFs, while SARS-  
163 CoV has 19 5'-ORFs. The length of each ORF is no less than 75 nt (**Table 1**).

164 A quantitative definition of HGS was proposed to investigate the similarity between viral coding sequences  
165 (CDSs) and the human genome (*Homo sapiens* GRCh38.p12 chromosomes). The CDS alignment scores were  
166 determined by using NCBI Blastn[17], and HGS was calculated by the formulas described in the Methods  
167 for each ORF in the coronavirus genome. The overall HGS of a full-length virus genome was obtained by  
168 the weighted sum of ORF HGSs. The weighting factor was the ratio of ORF length to the full-genome length.  
169 The ORF lengths of SARS-CoV and SARS-CoV-2 genomes are given in **Table 1**.

170 **Table 1. Location, length and residue number of each ORF of SARS-CoV-2 and SARS-CoV genomes.**

171 **The ORF names defined in different papers are listed in the first three columns(9, 18, 19).**

| ORF names |       |      | SARS-CoV |       |        |          | SARS-CoV-2 |       |        |          |
|-----------|-------|------|----------|-------|--------|----------|------------|-------|--------|----------|
| Narayanan | Marra | Rota | start    | stop  | length | residues | start      | stop  | length | residues |
| ORF1a     | ORF1a | 1a   | 3361     | 13413 | 10053  | 3350     | 266        | 13483 | 13218  | 4405     |
| N/R       | N/R   | N/R  | 13685    | 13759 | 75     | 24       | 13685      | 13759 | 75     | 24       |



|       |          |     |       |       |      |      |       |       |      |      |
|-------|----------|-----|-------|-------|------|------|-------|-------|------|------|
| ORF1b | ORF1b    | 1b  | 13398 | 21485 | 8088 | 2628 | 13768 | 21555 | 7788 | 2595 |
| S     | Sprotein | S   | 21492 | 25259 | 3768 | 1282 | 21536 | 25384 | 3849 | 1282 |
| N/R   | N/R      | N/R | 25207 | 25329 | 123  | 40   | 25332 | 25448 | 117  | 38   |
| ORF3a | ORF3     | X1  | 25268 | 26092 | 825  | 274  | 25393 | 26220 | 828  | 275  |
| E     | Eprotein | E   | 26117 | 26347 | 231  | 76   | 26245 | 26472 | 228  | 75   |
| M     | Mprotein | M   | 26398 | 27063 | 666  | 221  | 26523 | 27191 | 669  | 222  |
| ORF6  | ORF7     | X3  | 27074 | 27265 | 192  | 63   | 27202 | 27387 | 186  | 61   |
| ORF7a | ORF8     | X4  | 27273 | 27641 | 369  | 122  | 27394 | 27759 | 366  | 121  |
| ORF7b | ORF9     | N/R | 27638 | 27772 | 135  | 44   | 27756 | 27887 | 132  | 43   |
| ORF8a | ORF10    | N/R | 27779 | 27853 | 75   | 24   | 27894 | 28259 | 366  | 121  |
| ORF8b | ORF11    | X5  | 27862 | 28116 | 255  | 84   | N/R   | N/R   | N/R  | N/R  |
| N     | Nprotein | N   | 28118 | 29386 | 1269 | 422  | 28274 | 29533 | 1260 | 419  |
| N/R   | N/R      | N/R | 29413 | 29490 | 78   | 25   | 29558 | 29674 | 117  | 38   |

172

173 The HGS of ORFs was calculated for 2594 SARS-CoV-2 genomes with geolocation from China, the USA  
 174 and Europe. Phylogenetic trees representing the HGS relationship among virus strains are shown in Fig 1,  
 175 Fig 2 and Fig 3 for all three regions. The tree clusters were formed based on the distance between vectors  
 176 containing ORF HGS values. Most of the genomes had moderate HGS values. Genomes with similar HGS  
 177 values were usually in the same cluster and shared a common ancestor. The genomes with high HGS were  
 178 not all concentrated in the same cluster but may form several separate populations in the tree.

179

180 **Fig 1. The HGS tree contains 200 SARS-CoV-2 genomes from China. Distance between leaves**  
 181 **is the unweighted pair distance between the 10-ORF-HGS vector of genomes. The color bar**  
 182 **represents the overall HGS value of each genome (weighted sum of ORF HGS). Out of a total**  
 183 **of 200 viral genomes, 36 have unique ORF HGS values. The histogram at the top left shows**  
 184 **the distribution of all genome HGS.**

185

186 **Fig 2. The HGS tree contains 1538 SARS-CoV-2 genomes from the USA. Distance between**  
 187 **leaves is the unweighted pair distance between the 10-ORF-HGS vector of genomes. The color**

188 **bar represents the overall HGS value of each genome (weighted sum of ORF HGS). Out of a**  
189 **total of 1538 viral genomes, 140 have unique ORF HGS values. The histogram at the top left**  
190 **shows the distribution of all genome HGS.**

191

192 **Fig 3. The HGS tree contains 856 SARS-CoV-2 genomes from Europe. Distance between**  
193 **leaves is the unweighted pair distance between the 10-ORF-HGS vector of genomes. The color**  
194 **bar represents the overall HGS value of each genome (weighted sum of ORF HGS). Out of a**  
195 **total of 856 viral genomes, 98 have unique ORF HGS values. The histogram at the top left**  
196 **shows the distribution of all genome HGS.**

197 The full-length genome data were obtained from the Global Initiative on Sharing All Influenza Data  
198 (GISAID) database[15]. The sequence requirements were full-length sequences only, sequences with definite  
199 collection dates and locations, and no nucleotide names other than A, G, C and T. The number of genomes  
200 that met such requirements was 200 for China, 1538 for the USA and 856 for Europe at the time of article  
201 preparation. The HGS of human SARS-CoV genomes was also calculated. In NCBI GenBank[16], a total of  
202 25 SARS-CoV CDSs met the above sequence requirements.

203 **Fig 4** shows that ORF 7b of SARS-CoV had the highest similarity with the human genome, followed by  
204 ORF6, ORF7a, ORF3a and ORF 8. For SARS-CoV-2, ORF 7b, ORF 6 and ORF 8 were the top 3 genes with  
205 the highest HGSs. The mean HGS values of ORF6 and ORF8 in SARS-CoV-2 increased significantly,  
206 reaching 122% and 148% of those of SARS-CoV ORF6 and ORF8, respectively **Fig 4**. The roles of such  
207 HGS changes are not clear. However, by investigating the function of the SARS-CoV viral genes and  
208 proteins, the mechanism of the rapid spread of the newly emerged COVID-19 may be inferred from the HGS  
209 changes in SARS-CoV-2 genomes.

210

211 **Fig 4. The HGS values of SARS-CoV-2 and SARS-CoV genes. ORF6 and ORF8 of SARS-**  
212 **CoV-2 have apparently higher mean HGS values than those of SARS-CoV, reaching 122%**  
213 **and 148% of that of SARS-CoV ORF6 and ORF8, respectively.**

214 Studies have shown that ORF6 suppresses the induction of IFN and signaling pathways[19]. A membrane  
215 protein with 63 amino acids, ORF 6 blocked the IFNAR-STAT signaling pathway by limiting the mobility  
216 of the importin subunit KPNB1 and preventing the STAT1 complex from moving into the nucleus for ISRE  
217 activation[20]. Laboratory studies confirmed that the expression of ORF 6 transformed a sublethal infection  
218 into lethal encephalitis and enhanced the growth of the virus in cells[21]. In addition, ORF 6 circumvented  
219 IFN production by inhibiting IRF-3 phosphorylation in the (TRAF3)-(TBK1+IKK $\epsilon$ )-(IRF3)-(IFN $\beta$ )  
220 signaling pathway (**Fig 5**), which is an essential signaling pathway triggered by the viral sensors RIG-  
221 1/MDA5 and TLRs[22].

222

223 **Fig 5. SARS-CoV induced immune response in host cells. Host cell detect virus invasion**  
224 **mainly by TLPs and RIG1/MDA5 and lead to type I IFN signaling pathway. The receptor**  
225 **IFNAR senses type I IFN and leads to the JAK1-STAT signaling pathway, which expresses**  
226 **antiviral proteins and bring neighboring cell into anti-virus state. The ORF6 suppresses type**  
227 **I IFN expression by inhibiting translocation of STAT1+STAT2+IRF9 complex into nucleus.**  
228 **ORF 6 also circumvent IFN production by inhibit IRF-3 phosphorylation in signaling**  
229 **pathway (TRAF3)-(TBK1+IKK $\epsilon$ )-(IRF3)-(IFN $\beta$ ). The expression of ORF8b and 8ab enhance**  
230 **the IRF3 degradation, thus regulating immune functions of IRF3.**

231 An intact gene, ORF8 encodes a single accessory protein at the early stage of SARS-CoV infection and splits  
232 into two fragments, ORF8a and ORF8b, at later stages[23]. ORF8a and 8b have been observed in most SARS-

233 CoV-infected cells[24]. Wong et al.[25] found that the proteins ORF8b and ORF8ab in SARS-CoV inhibited  
234 the IFN response during viral infection. It was also reported that ORF8b formed insoluble intracellular  
235 aggregates and triggered cell death[26]. Amazingly, studies showed that SARS-CoV-related CoVs in  
236 horseshoe bats had 95% genome identities to human and civet SARS-CoVs, but the ORF8 protein amino  
237 acid similarities varied from 32% to 81%[27]. These findings indicate that the ORF8 gene is more prone than  
238 other CoV genes to mutations in virus-host interactions. Overexpression of ORF 8b and ORF 8ab had a  
239 significant effect on IRF3 dimerization rather than IRF3 phosphorylation[25]. The 8b region of SARS-CoV  
240 protein ORF8 functions in ubiquitination binding, ubiquitination and glycosylation, which may interact with  
241 IRF3[28]. The expression of ORF8b and 8ab enhanced IRF3 degradation, thus regulating the immune  
242 functions of IRF3 (**Fig 5**). Interestingly, ORF8 is an IFN antagonist expressed in the later stage of SARS-  
243 CoV infection. Studies showed that activation of IRF3 was blocked in the late stage of SARS-CoV infection,  
244 which was consistent with the late expression of ORF8b. Therefore, the expression of ORF8 may help to  
245 suppress the innate immune response that occurs in the later stages of infection and delay IFN $\beta$  signaling.  
246 This may explain why the virus expresses a late-stage IFN antagonist, such as ORF8.  
247 This work found that genes with high HGS were critical in suppressing innate immunity. Studies have shown  
248 that the ORF3b, ORF6 and N proteins of SARS-CoV enhance suppression of IFN $\beta$  expression in host innate  
249 immunity[29]. When IFN binds to the cell receptor IFNAR, the JAK/STAT signaling pathway is activated,  
250 leading to activation of IFN-stimulated genes (ISGs) containing an ISRE in their promoter. Expression of  
251 genes with an ISRE will trigger the production of hundreds of antiviral proteins inhibiting viral infections.  
252 Therefore, a reduction in expression from ISRE-containing promoters is a direct indicator of the enhanced  
253 ability to inhibit IFN synthesis.  
254 ISRE-containing promoter expression after Sendai virus infection needs both IFN synthesis and signaling.  
255 However, ISRE-containing promoter expression after IFN $\beta$  treatment requires only IFN signaling. In cells  
256 treated with IFN $\beta$ , it was found that N did not significantly inhibit the expression of the ISRE promoter[29].  
257 The expression level was approximately 78% of the value for the empty control. However, ORF3b and ORF6

258 still inhibited the expression of the ISRE promoter. We calculated the HGSs of ORF3b, ORF6 and N for  
259 SARS-CoV. Amazingly, the results clearly demonstrated that the ISRE-containing promoter expression  
260 decreased rapidly with increasing HGS (**Fig 6**), which provided evidence that there was a power law  
261 dependence of IFN synthesis inhibition based on HGS. The ISRE-containing promoter expression data  
262 followed the work of Kopecky-Bromberg et al.[29]. For 293T cells transfected with the SARS-CoV proteins  
263 and infected by Sendai virus[29], IFN inhibition obeys the following power law equation:  
264  $P = 0.004H^{-0.539} + 5.421$ , where  $H$  is the HGS value of the viral genes ORF3b, ORF6 and N, and  $P$  is  
265 the expression of genes with an ISRE as a percentage of the value for the empty control. The power law  
266 equation for cells treated with IFN $\beta$  is  $P = 0.00001H^{-11.007} + 3.633$ . The coefficient of determination  $R^2$   
267 reaches 1 for both data sets, indicating a perfect fit for the power law dependence on HGS.

268

269 **Fig 6. Inhibition of a promoter containing an ISRE by SARS-CoV proteins with different**  
270 **genome HGS values. Cells were cotransfected with the SARS-CoV proteins and either**  
271 **infected with Sendai virus (S. virus) or treated with IFN $\beta$  after 24 hours. The expression of**  
272 **the promoter decays rapidly with the increasing HGS of ORF 3b, ORF 6 and N, conforming**  
273 **to a power law.**

274 The findings suggested that HGS, i.e., similarity between the virus and host genome, is a reliable indicator  
275 of the suppression of innate immunity by viral proteins. Channappanavar et al. found that rapid SARS-CoV  
276 replication and a relative delay in IFN I signaling resulted in immune dysregulation and severe disease in  
277 infected mice[30]. Considering the significant HGS increments of ORF6 and ORF8 and their roles in  
278 suppressing innate immunity, it could be speculated that SARS-CoV-2 would further suppress IFN I  
279 synthesis and delay host innate immunity as HGS increases. This hypothesis may explain the delayed immune  
280 response and uncontrolled inflammatory response that lead to the epidemiological manifestations of SARS-

281 CoV-2, such as long incubation periods, mild symptoms, rapid spread and low mortality. However, the  
282 mechanism of how viral proteins cause further delay of immune signaling and how it leads to new  
283 immunopathological features remain largely unknown.

284 The discovery of increased HGS of ORF 6 and ORF 8 provides strong evidence that SARS-CoV-2 evolved  
285 to be more adapted to humans than SARS-CoV. These inferences offer a valuable picture of how SARS-  
286 CoV-2 could have become different from SARS-CoV. In addition, genetic mutations making the virus  
287 genome adapted to humans can also be identified through HGS analysis.

## 288 **The SARS-CoV-2 mutation 10818G>T is adapted to humans**

289 Recent studies have shown that SARS-CoV-2 had a high mutation rate, and new mutations have emerged in  
290 ORF1ab, S, ORF3a and ORF8[31, 32]. However, the types of mutations that contribute to viral adaptations  
291 in humans are not clear. To understand how mutations aid survival of SARS-CoV-2 populations under  
292 selective pressure, the accumulated nucleotide variants in consensus sequences were identified in 2594  
293 genomes from China, the USA and Europe. The virus genome was identified by its HGS values of ten ORFs  
294 (ORF1ab, S, ORF3a, E, M, ORF6, ORF7a, ORF7b, ORF8, and N). The percentages of virus strains with  
295 unique ORF HGSs were 18% (36 out of 200), 9% (140 out of 1538) and 11% (98 out of 856) for genomes  
296 with geolocations of China, the USA and Europe, respectively. A total of 74 mutations, 162 mutations and  
297 145 mutations were identified in genomes for these three regions, respectively. Gene mutation profiles of  
298 SARS-CoV-2 genomes with different HGSs are shown in Fig 6, Fig 7 and Fig 8. SARS-CoV-2 in different  
299 regions developed its own conserved mutations independently (**Table 2**). For example, the mutations in  
300 genomes with a geolocation of China included the ORF1ab mutations 10818G>T (TTG>TTT), 1132G>A  
301 (GTA>ATA), and 8517C>T (AGC>AGT); ORF8 mutation 251T>C (TTA>TCA); N mutation 415T>C  
302 (TTG>CTG); S mutation 1868A>G (GAT>GGT); and ORF3a mutation 752G>T (GGT>GTT). Here, the

303 number before the mutated nucleotide represents the sequence position relative to the starting point of the  
304 ORF where the mutation is located.

305

306 **Fig 7. Mutation profile for SARS-CoV-2 genomes (geolocation of China) with different HGS.**  
307 **Out of a total of 200 viral genomes, 36 genomes have unique HGS values. A total of 74**  
308 **mutations were identified in all the genomes. The top 7 conserved mutations with were shown**  
309 **with special markers at the top of colored blocks representing ORFs. Mutation 10818G>T in**  
310 **ORF1ab (codon TTG>TTT) occurred in populations with high HGS, which results in amino**  
311 **acid M37F mutation in transmembrane protein nsp6. The mutation rarely occurred in**  
312 **populations with low/moderate HGS.**

313

314 **Fig 8. Mutation profile for SARS-CoV-2 genomes (geolocation of the USA) with different**  
315 **HGS. Out of a total of 1538 viral genomes, 140 genomes have unique HGS values. A total of**  
316 **162 mutations were identified in all the genomes. The top 7 conserved mutations with were**  
317 **shown with special markers at the top of colored blocks representing ORFs. Mutation**  
318 **10818G>T in ORF1ab (codon TTG>TTT) occurred in populations with high HGS, which**  
319 **results in amino acid M37F mutation in transmembrane protein nsp6. The mutation rarely**  
320 **occurred in populations with low/moderate HGS.**

321

322 **Fig 9. Mutation profile for SARS-CoV-2 genomes (geolocation of Europe) with different HGS.**  
323 **Out of a total of 856 viral genomes, 98 genomes have unique HGS values. A total of 145**  
324 **mutations were identified in all the genomes. The top 7 conserved mutations with were shown**

325 **with special markers at the top of colored blocks representing ORFs. Mutation 10818G>T in**  
 326 **ORF1ab (codon TTG>TTT) occurred in populations with high HGS, which results in amino**  
 327 **acid M37F mutation in transmembrane protein nsp6. The mutation rarely occurred in**  
 328 **populations with low/moderate HGS.**

329 **Table 2. Conserved mutations identified in SARS-CoV-2 genomes with geolocations of China, the USA**  
 330 **and Europe.**

331

| mutation | Location(ORF) | protein | residue mutation | residue type  | residue property | Geolocation |
|----------|---------------|---------|------------------|---------------|------------------|-------------|
| TTG>TTT  | 10818         | nsp6    | M37F             | Phenylalanine | Hydrophobic      | China       |
| GTA>ATA  | 1132          | nsp2    | V198I            | Isoleucine    | Hydrophobic      | China       |
| AGC>AGT  | 8517          | nsp4    | S76S             | Serine        | Polar            | China       |
| TTA>TCA  | 251           | ORF8    | L84S             | Serine        | Polar            | China       |
| TTG>CTG  | 415           | N       | M139M            | Methionine    | Hydrophobic      | China       |
| GAT>GGT  | 1868          | S       | D623G            | Glycine       | Special          | China       |
| GGT>GTT  | 752           | ORF3a   | G251V            | Valine        | Hydrophobic      | China       |
| ATC>ACC  | 794           | nsp2    | I85T             | Threonine     | Polar            | USA         |
| CAT>CAG  | 171           | ORF3a   | H57Q             | Glutamine     | Polar            | USA         |
| TTT>TTC  | 2772          | nsp3    | F106F            | Phenylalanine | Hydrophobic      | USA         |
| CTT>CCT  | 13859         | nsp12   | L228P            | Proline       | Special          | USA         |
| GGT>GAT  | 1868          | S       | G623D            | Aspartic acid | Negative         | USA         |
| TTG>TTT  | 10818         | nsp6    | M37F             | Phenylalanine | Hydrophobic      | USA         |
| AGC>AGT  | 8517          | nsp4    | S76S             | Serine        | Polar            | USA         |
| TTT>TTC  | 2772          | nsp3    | F106F            | Phenylalanine | Hydrophobic      | Europe      |
| CTT>CCT  | 13859         | nsp12   | L228P            | Proline       | Special          | Europe      |
| TTG>TTT  | 10818         | nsp6    | M37F             | Phenylalanine | Hydrophobic      | Europe      |
| GGT>GAT  | 1868          | S       | G623D            | Aspartic acid | Negative         | Europe      |
| GGT>GTT  | 752           | ORF3a   | G251V            | Valine        | Hydrophobic      | Europe      |
| TAC>TAT  | 14256         | nsp12   | Y360Y            | Tyrosine      | Hydrophobic      | Europe      |
| CAG>CAT  | 171           | ORF3a   | Q57H             | Histidine     | Positive         | Europe      |

332 Of all the gene mutations, the ORF1ab 10818G>T(TTG>TTT) mutation is the most interesting. This mutation  
 333 survived in all three regions (**Fig 10**). In addition, this mutation occurred only in the high HGS population  
 334 rather than in that with a lower HGS (**Table 3**). The SARS-CoV-2 ORF1ab gene encodes the precursor  
 335 polyprotein pp1ab, which is then cleaved into 16 nonstructural proteins (nsp1 to nsp16) by virus-encoded  
 336 proteinases. nsp6 plays a critical role in membrane anchoring of the RNA replication/transcription complex.



337 The expression of the nonstructural protein nsp6 along with nsp3 and nsp4 mediates the formation of double-  
338 membrane vesicles (DMVs)[33], which are organelle-like structures for viral genome replication and protect  
339 against host cell defenses.

340

341 **Fig 10. Highly conserved mutations identified in SARS-CoV-2 genomes with geolocations of**  
342 **China, the USA and Europe. The three regions have different sets of mutations. The TTT (F,**  
343 **Phenylalanine) mutation occurred in all three regions. TTT represents the mutation**  
344 **10818G>T(TTG>TTT) in ORF1ab. The F in the circle represents the amino acid mutation**  
345 **M37F (Methionine to Phenylalanine) in nonstructural protein nsp6. The P, H, +, - and S in**  
346 **brackets in the legend represent polar, hydrophobic, positively charged, negatively charged**  
347 **and special residues, respectively.**

348

349 **Table 3. The mutation 10818G>T in ORF1ab (codon TTG>TTT) of SARS-CoV-2 mostly occurs in**  
350 **high-HGS (the first four columns) and rarely occurs in low-HGS population (the last four columns).**  
351 **The top 15 genomes with high HGS are chosen as high-HGS population. The last 15 genomes with low**  
352 **HGS are chosen as low-HGS population. GISAID accession ID and locations are given for genomes**  
353 **from China, the USA and Europe.**

| Genome ID             | HGS     | Seq. (10813-10823) | Mut. | Genome ID             | HGS     | Seq. (10813-10823) | Mut. |
|-----------------------|---------|--------------------|------|-----------------------|---------|--------------------|------|
| EPI-ISL-416331 China  | 0.07085 | TTTTTTTATGA        | T    | EPI-ISL-406801 China  | 0.06999 | TTTTTGTATGA        | G    |
| EPI-ISL-431783 China  | 0.07081 | TTTTTTTATGA        | T    | EPI-ISL-412982 China  | 0.06986 | TTTTTGTATGA        | G    |
| EPI-ISL-431180 China  | 0.07080 | TTTTTGTATGA        | G    | EPI-ISL-421262 China  | 0.06943 | TTTTTTTATGA        | T    |
| EPI-ISL-416373 China  | 0.07078 | TTTTTTTATGA        | T    | EPI-ISL-406534 China  | 0.06942 | TTTTTGTATGA        | G    |
| EPI-ISL-424360 China  | 0.07074 | TTTTTGTATGA        | G    | EPI-ISL-413520 China  | 0.06936 | TTTTTGTATGA        | G    |
| EPI-ISL-405839 China  | 0.07072 | TTTTTGTATGA        | G    | EPI-ISL-416397 China  | 0.06935 | TTTTTGTATGA        | G    |
| EPI-ISL-416325 China  | 0.07071 | TTTTTGTATGA        | G    | EPI-ISL-421259 China  | 0.06935 | TTTTTGTATGA        | G    |
| EPI-ISL-402127 China  | 0.07071 | TTTTTGTATGA        | G    | EPI-ISL-406533 China  | 0.06934 | TTTTTGTATGA        | G    |
| EPI-ISL-406595 China  | 0.07069 | TTTTTGTATGA        | G    | EPI-ISL-421250 China  | 0.06931 | TTTTTGTATGA        | G    |
| EPI-ISL-408515 China  | 0.07069 | TTTTTGTATGA        | G    | EPI-ISL-416330 China  | 0.06930 | TTTTTGTATGA        | G    |
| EPI-ISL-421253 China  | 0.07069 | TTTTTGTATGA        | G    | EPI-ISL-418991 China  | 0.06924 | TTTTTGTATGA        | G    |
| EPI-ISL-412978 China  | 0.07067 | TTTTTGTATGA        | G    | EPI-ISL-406798 China  | 0.06922 | TTTTTGTATGA        | G    |
| EPI-ISL-421256 China  | 0.07066 | TTTTTGTATGA        | G    | EPI-ISL-416399 China  | 0.06915 | TTTTTGTATGA        | G    |
| EPI-ISL-412459 China  | 0.07066 | TTTTTGTATGA        | G    | EPI-ISL-413749 China  | 0.06914 | TTTTTGTATGA        | G    |
| EPI-ISL-403932 China  | 0.07065 | TTTTTGTATGA        | G    | EPI-ISL-421261 China  | 0.06866 | TTTTTGTATGA        | G    |
| EPI-ISL-427288 USA    | 0.07205 | TTTTTTTATGA        | T    | EPI-ISL-437866 USA    | 0.06931 | TTTTTGTATGA        | G    |
| EPI-ISL-427190 USA    | 0.07195 | TTTTTGTATGA        | G    | EPI-ISL-437384 USA    | 0.06928 | TTTTTGTATGA        | G    |
| EPI-ISL-435558 USA    | 0.07153 | TTTTTTTATGA        | T    | EPI-ISL-424901 USA    | 0.06928 | TTTTTGTATGA        | G    |
| EPI-ISL-436064 USA    | 0.07148 | TTTTTTTATGA        | T    | EPI-ISL-417353 USA    | 0.06927 | TTTTTGTATGA        | G    |
| EPI-ISL-430939 USA    | 0.07144 | TTTTTTTATGA        | T    | EPI-ISL-445078 USA    | 0.06923 | TTTTTGTATGA        | G    |
| EPI-ISL-430404 USA    | 0.07144 | TTTTTGTATGA        | G    | EPI-ISL-444068 USA    | 0.06922 | TTTTTGTATGA        | G    |
| EPI-ISL-406223 USA    | 0.07142 | TTTTTTTATGA        | T    | EPI-ISL-429641 USA    | 0.06921 | TTTTTGTATGA        | G    |
| EPI-ISL-437857 USA    | 0.07138 | TTTTTGTATGA        | G    | EPI-ISL-413458 USA    | 0.06921 | TTTTTGTATGA        | G    |
| EPI-ISL-444760 USA    | 0.07138 | TTTTTGTATGA        | G    | EPI-ISL-427209 USA    | 0.06915 | TTTTTGTATGA        | G    |
| EPI-ISL-435444 USA    | 0.07137 | TTTTTTTATGA        | T    | EPI-ISL-417453 USA    | 0.06914 | TTTTTGTATGA        | G    |
| EPI-ISL-428776 USA    | 0.07133 | TTTTTGTATGA        | G    | EPI-ISL-416711 USA    | 0.06914 | TTTTTGTATGA        | G    |
| EPI-ISL-411956 USA    | 0.07132 | TTTTTGTATGA        | G    | EPI-ISL-416677 USA    | 0.06911 | TTTTTGTATGA        | G    |
| EPI-ISL-418897 USA    | 0.07128 | TTTTTGTATGA        | G    | EPI-ISL-429645 USA    | 0.06910 | TTTTTGTATGA        | G    |
| EPI-ISL-437799 USA    | 0.07085 | TTTTTTTATGA        | T    | EPI-ISL-435562 USA    | 0.06864 | TTTTTGTATGA        | G    |
| EPI-ISL-422966 USA    | 0.07081 | TTTTTTTATGA        | T    | EPI-ISL-427247 USA    | 0.06856 | TTTTTGTATGA        | G    |
| EPI-ISL-437322 Europe | 0.07226 | TTTTTTTATGA        | T    | EPI-ISL-445227 Europe | 0.06929 | TTTTTGTATGA        | G    |
| EPI-ISL-437303 Europe | 0.07155 | TTTTTTTATGA        | T    | EPI-ISL-418264 Europe | 0.06925 | TTTTTGTATGA        | G    |
| EPI-ISL-448774 Europe | 0.07151 | TTTTTGTATGA        | G    | EPI-ISL-447679 Europe | 0.06925 | TTTTTGTATGA        | G    |
| EPI-ISL-447665 Europe | 0.07151 | TTTTTTTATGA        | T    | EPI-ISL-447510 Europe | 0.06925 | TTTTTGTATGA        | G    |
| EPI-ISL-418243 Europe | 0.07149 | TTTTTTTATGA        | T    | EPI-ISL-413489 Europe | 0.06922 | TTTTTGTATGA        | G    |
| EPI-ISL-430852 Europe | 0.07148 | TTTTTTTATGA        | T    | EPI-ISL-428688 Europe | 0.06922 | TTTTTGTATGA        | G    |
| EPI-ISL-447654 Europe | 0.07148 | TTTTTTTATGA        | T    | EPI-ISL-428691 Europe | 0.06922 | TTTTTGTATGA        | G    |
| EPI-ISL-420423 Europe | 0.07139 | TTTTTGTATGA        | G    | EPI-ISL-434619 Europe | 0.06921 | TTTTTGTATGA        | G    |
| EPI-ISL-445241 Europe | 0.07139 | TTTTTGTATGA        | G    | EPI-ISL-445243 Europe | 0.06913 | TTTTTGTATGA        | G    |
| EPI-ISL-434662 Europe | 0.07135 | TTTTTGTATGA        | G    | EPI-ISL-448468 Europe | 0.06910 | TTTTTGTATGA        | G    |
| EPI-ISL-437896 Europe | 0.07133 | TTTTTGTATGA        | G    | EPI-ISL-434665 Europe | 0.06908 | TTTTTGTATGA        | G    |
| EPI-ISL-447634 Europe | 0.07133 | TTTTTGTATGA        | G    | EPI-ISL-430859 Europe | 0.06867 | TTTTTGTATGA        | G    |
| EPI-ISL-426379 Europe | 0.07081 | TTTTTTTATGA        | T    | EPI-ISL-418265 Europe | 0.06856 | TTTTTGTATGA        | G    |
| EPI-ISL-448502 Europe | 0.07079 | TTTTTGTATGA        | G    | EPI-ISL-435144 Europe | 0.06848 | TTTTTGTATGA        | G    |
| EPI-ISL-408430 Europe | 0.07078 | TTTTTTTATGA        | T    | EPI-ISL-437096 Europe | 0.06795 | TTTTTGTATGA        | G    |

355

356 Studies on the nsp6 protein showed that the protein is a transmembrane protein with 6 transmembrane  
357 regions[34]. This 10818G>T ORF1ab mutation caused an amino acid mutation, M37F, in the nonstructural  
358 protein nsp6, which is located in a loop between the first and second transmembrane domains on the N-  
359 terminal side (**Fig 11**). This finding strongly suggested that the 10818G>T (M37F) mutation survived a  
360 selection event and resulted in a new population of SARS-CoV-2 with high HGS, which could be more  
361 adapted to humans. In addition, the simultaneous occurrence of ORF1ab 10818G>T in all three regions  
362 demonstrated that the mutation was highly stable in human-adapted strains. Although mutations in the  
363 nonstructural proteins nsp4 and nsp6 may affect the assembly of DMVs and viral autophagy, the underlying  
364 basis of how the M37F mutation results in SARS-CoV-2 adaptation in humans is not clear.

365

366 **Fig 11. The topology of transmembrane protein nsp6 and the identified M37F mutation**  
367 **located in a loop between the first and second transmembrane domains on the N-terminal**  
368 **side.**

369 The identification of conserved mutations demonstrates that SARS-CoV-2 can improve host adaptation. It is  
370 reasonable to hypothesize that high HGS in SARS-CoV-2 genomes and conserved mutations may explain  
371 the epidemiological characteristics of COVID-19, such as mild symptoms, rapid spread and low mortality.  
372 However, the mechanism behind the impairment remains poorly understood and calls for future laboratory  
373 investigations. Viral genome data

## 374 **Discussion**

375 The HGS differences between SARS-CoV-2 and SARS-CoV genomes are critical to understanding clinical  
376 manifestations of the ongoing pandemic. ORF 6, 7b, 8 are the top 3 genes with significant HGS in SARS-  
377 CoV-2. What's more, ORF 6 and ORF 8 of the SARS-CoV-2 have clear increments in HGS, up to about

378 122% and 148% of that of SARS-CoV. Such apparent HGS changes suggest that these ORFs are important  
379 in defining the difference between SARS-CoV-2 and SARS-CoV. In the ongoing SARS-CoV-2 pandemic,  
380 the number of infected people is growing much faster than SARS and the total number of diagnosed cases  
381 exceeded that of SARS. But the mortality rate (about 3 %) was lower than SARS (about 11%)[35]. It is  
382 known that the primary targets of SARS-CoV are lung and small intestine[36, 37]. Recent studies have found  
383 that the SARS-CoV-2 may impair kidney function[38], infect the digestive system[39] and heart[40], and  
384 cause liver damage[41]. Recent study showed that SARS-CoV-2 can cause thromboembolic  
385 complications[42]. It has been reported that the SARS-CoV-2 virus can be found in stools and urine[40, 43].  
386 In addition, an unusually long incubation period has been reported, during which more than half of the  
387 patients had no signs of disease and the virus carriers may be highly contagious [43]. Why the COVID-19 is  
388 so different from SARS is still not clear. But the mutations in virus genome and encoded proteins (such as  
389 spike protein S) are believed as an important factor.

390 The knowledge on SARS-CoV-2 accessory proteins by now is quite limited. However, the viral genome and  
391 proteins of SARS-CoV have been studied in depth in the past decade. Coronavirus has evolved to escape the  
392 innate immune (especially IFN-I expression and signaling) through suppression of IFN induction and  
393 signaling pathways by non-structural proteins (nsps), structural proteins (S, E, M, N), and accessory proteins  
394 (ORF 3a, 6, 7a, 7b, 8a, 8b) [20, 44-53]. By comparing the SARS-CoV gene HGS with that of SARS-CoV-2,  
395 the obvious host-genome similarity changes shed light on the cause of rapid spread of COVID-19.

396 A power-law relationship is recognized between HGS and the expression of ISRE promoter, which is a direct  
397 indicator of the virus to inhibit interferon synthesis. The HGS of ORF6 and ORF8 increase greatly in SARS-  
398 CoV-2, which represents enhanced ability in suppressing innate immune. Although the functions of accessory  
399 proteins of SARS-CoV-2 have not been well studied, the secondary structure prediction reveals that ORF 6  
400 and 8 are transmembrane proteins and may have related functions as in SARS-CoV. In fact, the SARS-CoV-2  
401 contains a full-length ORF 8, which in SARS-CoV this reading frame is divided into ORF 8a and ORF 8b.  
402 Linking of ORF 8a and ORF 8b into a single continuous gene fragment had no significant effect on virus

403 growth and RNA replication *in vitro*[54], which indicates that there are ORFs of SARS-CoV-2 may be similar  
404 to ORFs of SARS-CoV in function.

405 The discovery of increased HGS of ORF 6 and ORF 8 provide a strong evidence that SARS-COV-2 evolved  
406 to be more adaptable to humans than SARS-CoV. Based on these findings, following conjecture is proposed  
407 that the SARS-CoV-2 genes involved in suppressing the host's innate immunity are more powerful.  
408 Therefore, SARS-CoV-2 causes the delayed response of host innate immunity, which results in rapid  
409 transmission, low mortality and asymptomatic infection. These inferences are based on bioinformatics data,  
410 but offer a valuable picture of how SARS-CoV-2 could become different from SARS-CoV. In addition, the  
411 HGS method can also identify genetic mutations that help the virus adapt to humans.

412 It took the coronavirus 17 years to update from SARS-CoV to SARS-CoV-2. The significant increase in host-  
413 genome similarity distinguishes SARS-COV-2 from SARS-COV. SARS-CoV-2 found out a way to improve  
414 host adaptation. It is reasonable that high HGS may explain the quite different epidemiological characteristics  
415 of SARS-CoV-2, such as mild symptoms, rapid spread and low mortality. But the mechanism behind the  
416 impairment remains poorly understood and calls for future laboratory investigations. The COVID-19 appears  
417 to be less able to cause deaths than SARS and MERS during the ongoing pandemic. However, there is still a  
418 serious warning sign about viral mutation. The threat of another coronavirus outbreak with high  
419 infectiousness and mortality remains an alarming possibility.

## 420 **Funding**

421 This work was supported by the C.C. Lin specific fund.

## 422 **Acknowledgments**

423 I thank the laboratories for sharing SARS-CoV-2 and SARS-CoV genomes through GISAID and  
424 NCBI database.

## 425 **References**

- 426 1. Wu F, Zhao S, Yu B, Chen YM, Wang W, Song ZG, et al. A new coronavirus associated with  
427 human respiratory disease in China. *Nature*. 2020;579(7798):265-9. Epub 2020/02/06. PubMed  
428 PMID: 32015508; PubMed Central PMCID: PMC7094943.
- 429 2. Xu X, Chen P, Wang J, Feng J, Zhou H, Li X, et al. Evolution of the novel coronavirus from the  
430 ongoing Wuhan outbreak and modeling of its spike protein for risk of human transmission.  
431 *SCIENCE CHINA Life Sciences*. 2020.
- 432 3. He X, Lau EHY, Wu P, Deng X, Wang J, Hao X, et al. Temporal dynamics in viral shedding and  
433 transmissibility of COVID-19. *Nature Medicine*. 2020;26(5):672-5.
- 434 4. Fiers W, Contreras R, Haegeman G, Rogiers R, Van de Voorde A, Van Heuverswyn H, et al.  
435 Complete nucleotide sequence of SV40 DNA. *Nature*. 1978;273(5658):113-20.
- 436 5. Rosenberg M, Segal S, Kuff EL, Singer MF. The nucleotide sequence of repetitive monkey DNA  
437 found in defective simian virus 40. *Cell*. 1977;11(4):845-57.
- 438 6. Senkevich TG, Bugert JJ, Sisler JR, Koonin EV, Darai G, Moss B. Genome sequence of a human  
439 tumorigenic poxvirus: prediction of specific host response-evasion genes. *Science (New York,*  
440 *NY)*. 1996;273(5276):813-6. Epub 1996/08/09. PubMed PMID: 8670425.
- 441 7. Chang Y, Ma J, Zhang M, Yu Y. Preliminary study on genome homology of viruses and human.  
442 *J N BETHUNE UNIV MED SCI*. 1997;23(3):242-4.
- 443 8. Shackelton LA, Holmes EC. The evolution of large DNA viruses: combining genomic  
444 information of viruses and their hosts. *Trends in Microbiology*. 2004;12(10):458-65.
- 445 9. Rouse BT, Sehrawat S. Immunity and immunopathology to viruses: what decides the outcome?  
446 *Nature Reviews Immunology*. 2010;10(7):514-26.

- 447 10. Van Kaer L, Joyce S. Viral evasion of antigen presentation: not just for peptides anymore.  
448 *Nature Immunology*. 2006;7(8):795-7.
- 449 11. Enard D, Petrov DA. Evidence that RNA Viruses Drove Adaptive Introgression between  
450 Neanderthals and Modern Humans. *Cell*. 2018;175(2):360-71.e13. PubMed PMID: 30290142.
- 451 12. Enard D, Cai L, Gwennap C, Petrov DA. Viruses are a dominant driver of protein adaptation in  
452 mammals. *Elife*. 2016;5:e12469. PubMed PMID: 27187613.
- 453 13. Rothenburg S, Brennan G. Species-Specific Host–Virus Interactions: Implications for Viral  
454 Host Range and Virulence. *Trends in Microbiology*. 2020;28(1):46-56.
- 455 14. NCBI RC. Database resources of the National Center for Biotechnology Information. *Nucleic  
456 acids research*. 2018;46(D1):D8-d13. Epub 2017/11/16. PubMed PMID: 29140470; PubMed  
457 Central PMCID: PMC5753372.
- 458 15. Elbe S, Buckland-Merrett G. Data, disease and diplomacy: GISAID's innovative contribution to  
459 global health. *Global Challenges*. 2017;1(1):33-46.
- 460 16. Benson DA, Cavanaugh M, Clark K, Karsch-Mizrachi I, Lipman DJ, Ostell J, et al. GenBank.  
461 *Nucleic acids research*. 2013;41(Database issue):D36-42. Epub 2012/11/30. PubMed PMID:  
462 23193287; PubMed Central PMCID: PMC3531190.
- 463 17. Altschul SF, Gish W, Miller W, Myers EW, Lipman DJ. Basic local alignment search tool.  
464 *Journal of Molecular Biology*. 1990;215(3):403-10.
- 465 18. Karlin S, Altschul SF. Methods for assessing the statistical significance of molecular sequence  
466 features by using general scoring schemes. *Proc Natl Acad Sci U S A*. 1990;87(6):2264-8. PubMed  
467 PMID: 2315319.
- 468 19. Frieman M, Yount B, Heise M, Kopecky-Bromberg SA, Palese P, Baric RS. Severe Acute  
469 Respiratory Syndrome Coronavirus ORF6 Antagonizes STAT1 Function by Sequestering Nuclear

- 470 Import Factors on the Rough Endoplasmic Reticulum/Golgi Membrane. *Journal of Virology*.  
471 2007;81(18):9812.
- 472 20. Totura AL, Baric RS. SARS coronavirus pathogenesis: host innate immune responses and viral  
473 antagonism of interferon. *Current Opinion in Virology*. 2012;2(3):264-75.
- 474 21. Pewe L, Zhou H, Netland J, Tangadu C, Olivares H, Shi L, et al. A SARS-CoV-specific protein  
475 enhances virulence of an attenuated strain of mouse hepatitis virus. *Advances in experimental*  
476 *medicine and biology*. 2006;581:493-8. Epub 2006/10/14. PubMed PMID: 17037583.
- 477 22. Chau TL, Gioia R, Gatot JS, Patrascu F, Carpentier I, Chapelle JP, et al. Are the IKKs and IKK-  
478 related kinases TBK1 and IKK-epsilon similarly activated? *Trends in biochemical sciences*.  
479 2008;33(4):171-80. Epub 2008/03/21. PubMed PMID: 18353649.
- 480 23. Guan Y, Zheng BJ, He YQ, Liu XL, Zhuang ZX, Cheung CL, et al. Isolation and  
481 characterization of viruses related to the SARS coronavirus from animals in southern China.  
482 *Science (New York, NY)*. 2003;302(5643):276-8. Epub 2003/09/06. PubMed PMID: 12958366.
- 483 24. Keng C-T, Choi Y-W, Welkers MRA, Chan DZL, Shen S, Gee Lim S, et al. The human severe  
484 acute respiratory syndrome coronavirus (SARS-CoV) 8b protein is distinct from its counterpart in  
485 animal SARS-CoV and down-regulates the expression of the envelope protein in infected cells.  
486 *Virology*. 2006;354(1):132 - 42.
- 487 25. Wong HH, Fung TS, Fang S, Huang M, Le MT, Liu DX. Accessory proteins 8b and 8ab of  
488 severe acute respiratory syndrome coronavirus suppress the interferon signaling pathway by  
489 mediating ubiquitin-dependent rapid degradation of interferon regulatory factor 3. *Virology*.  
490 2018;515:165-75.



- 491 26. Shi C-S, Nabar NR, Huang N-N, Kehrl JH. SARS-Coronavirus Open Reading Frame-8b  
492 triggers intracellular stress pathways and activates NLRP3 inflammasomes. *Cell Death Discov.*  
493 2019;5:101-. PubMed PMID: 31231549.
- 494 27. Lau SKP, Feng Y, Chen H, Luk HKH, Yang W-H, Li KSM, et al. Severe Acute Respiratory  
495 Syndrome (SARS) Coronavirus ORF8 Protein Is Acquired from SARS-Related Coronavirus from  
496 Greater Horseshoe Bats through Recombination. *Journal of virology.* 2015;89(20):10532-47. Epub  
497 08/12. PubMed PMID: 26269185.
- 498 28. Le TM, Wong HH, Tay FPL, Fang S, Keng C-T, Tan YJ, et al. Expression, post-translational  
499 modification and biochemical characterization of proteins encoded by subgenomic mRNA8 of the  
500 severe acute respiratory syndrome coronavirus. *The FEBS Journal.* 2007;274(16):4211-22.
- 501 29. Kopecky-Bromberg SA, Martínez-Sobrido L, Frieman M, Baric RA, Palese P. Severe Acute  
502 Respiratory Syndrome Coronavirus Open Reading Frame (ORF) 3b, ORF 6, and Nucleocapsid  
503 Proteins Function as Interferon Antagonists. *Journal of Virology.* 2007;81(2):548.
- 504 30. Channappanavar R, Fehr Anthony R, Vijay R, Mack M, Zhao J, Meyerholz David K, et al.  
505 Dysregulated Type I Interferon and Inflammatory Monocyte-Macrophage Responses Cause Lethal  
506 Pneumonia in SARS-CoV-Infected Mice. *Cell Host & Microbe.* 2016;19(2):181-93.
- 507 31. Wang C, Liu Z, Chen Z, Huang X, Xu M, He T, et al. The establishment of reference sequence  
508 for SARS-CoV-2 and variation analysis. *Journal of Medical Virology.* 2020;92(6):667-74.
- 509 32. Pachetti M, Marini B, Benedetti F, Giudici F, Mauro E, Storici P, et al. Emerging SARS-CoV-  
510 2 mutation hot spots include a novel RNA-dependent-RNA polymerase variant. *Journal of*  
511 *translational medicine.* 2020;18(1):179. Epub 2020/04/24. PubMed PMID: 32321524; PubMed  
512 Central PMCID: PMC7174922.

- 513 33. Baliji S, Cammer SA, Sobral B, Baker SC. Detection of nonstructural protein 6 in murine  
514 coronavirus-infected cells and analysis of the transmembrane topology by using bioinformatics and  
515 molecular approaches. *Journal of virology*. 2009;83(13):6957-62. Epub 04/22. PubMed PMID:  
516 19386712.
- 517 34. Oostra M, Hagemeyer MC, van Gent M, Bekker CPJ, te Lintelo EG, Rottier PJM, et al.  
518 Topology and Membrane Anchoring of the Coronavirus Replication Complex: Not All  
519 Hydrophobic Domains of nsp3 and nsp6 Are Membrane Spanning. *Journal of Virology*.  
520 2008;82(24):12392.
- 521 35. World Health Organization (2003) Consensus document on the epidemiology of severe acute  
522 respiratory syndrome (SARS). Department of Communicable Disease Surveillance and Response,  
523 WHO: 2003.
- 524 36. Lee N, Hui D, Wu A, Chan P, Cameron P, Joynt GM, et al. A major outbreak of severe acute  
525 respiratory syndrome in Hong Kong. *The New England journal of medicine*. 2003;348(20):1986-  
526 94. Epub 2003/04/16. doi: 10.1056/NEJMoa030685. PubMed PMID: 12682352.
- 527 37. Chan WS, Wu C, Chow SCS, Cheung T, To K-F, Leung W-K, et al. Coronaviral hypothetical  
528 and structural proteins were found in the intestinal surface enterocytes and pneumocytes of severe  
529 acute respiratory syndrome (SARS). *Modern Pathology*. 2005;18(11):1432-9. doi:  
530 10.1038/modpathol.3800439.
- 531 38. Li Z, Wu M, Guo J, Yao J, Liao X, Song S, et al. Caution on Kidney Dysfunctions of 2019-  
532 nCoV Patients. *medRxiv*. 2020:2020.02.08.20021212. doi: 10.1101/2020.02.08.20021212.
- 533 39. Zhang H, Kang Z, Gong H, Xu D, Wang J, Li Z, et al. The digestive system is a potential route  
534 of 2019-nCoV infection: a bioinformatics analysis based on single-cell transcriptomes. *bioRxiv*.  
535 2020:2020.01.30.927806. doi: 10.1101/2020.01.30.927806.

- 536 40.Zou X, Chen K, Zou J, Han P, Hao J, Han Z. The single-cell RNA-seq data analysis on the  
537 receptor ACE2 expression reveals the potential risk of different human organs vulnerable to Wuhan  
538 2019-nCoV infection *Frontiers of Medicine* 2020;online.
- 539 41.Chai X, Hu L, Zhang Y, Han W, Lu Z, Ke A, et al. Specific ACE2 Expression in Cholangiocytes  
540 May Cause Liver Damage After 2019-nCoV Infection. *bioRxiv*. 2020:2020.02.03.931766. doi:  
541 10.1101/2020.02.03.931766.
- 542 42.Lamamri M, Chebbi A, Mamane J, Abbad S, Munuzzolini M, Sarfati F, et al. Priapism in a  
543 patient with coronavirus disease 2019 (COVID-19): A case report. *Am J Emerg Med*. 2020. doi:  
544 10.1016/j.ajem.2020.06.027. PubMed PMID: PMC7301054.
- 545 43.Guan W-j, Ni Z-y, Hu Y, Liang W-h, Ou C-q, He J-x, et al. Clinical characteristics of 2019  
546 novel coronavirus infection in China. *medRxiv*. 2020:2020.02.06.20020974. doi:  
547 10.1101/2020.02.06.20020974.
- 548 44.Dosch SF, Mahajan SD, Collins AR. SARS coronavirus spike protein-induced innate immune  
549 response occurs via activation of the NF- $\kappa$ B pathway in human monocyte macrophages in vitro.  
550 *Virus Research*. 2009;142(1):19-27. doi: <https://doi.org/10.1016/j.virusres.2009.01.005>.
- 551 45.Fung TS, Liu DX. Human Coronavirus: Host-Pathogen Interaction. *Annual review of*  
552 *microbiology*. 2019;73:529-57. Epub 2019/06/22. doi: 10.1146/annurev-micro-020518-115759.  
553 PubMed PMID: 31226023.
- 554 46.Kikkert M. Innate Immune Evasion by Human Respiratory RNA Viruses. *J Innate Immun*.  
555 2020;12(1):4-20. Epub 10/14. doi: 10.1159/000503030. PubMed PMID: 31610541.
- 556 47.Wong L-YR, Lui P-Y, Jin D-Y. A molecular arms race between host innate antiviral response  
557 and emerging human coronaviruses. *Virologica Sinica*. 2016;31(1):12-23. doi: 10.1007/s12250-  
558 015-3683-3.

- 559 48.Zhang Q, Yoo D. Immune evasion of porcine enteric coronaviruses and viral modulation of  
560 antiviral innate signaling. *Virus Research*. 2016;226:128-41. doi:  
561 <https://doi.org/10.1016/j.virusres.2016.05.015>.
- 562 49.DeDiego ML, Nieto-Torres JL, Jimenez-Guardeño JM, Regla-Nava JA, Castaño-Rodríguez C,  
563 Fernandez-Delgado R, et al. Coronavirus virulence genes with main focus on SARS-CoV envelope  
564 gene. *Virus Research*. 2014;194:124-37. doi: <https://doi.org/10.1016/j.virusres.2014.07.024>.
- 565 50.Saitoh T, Akira S. Regulation of innate immune responses by autophagy-related proteins. *J Cell*  
566 *Biol*. 2010;189(6):925-35. doi: 10.1083/jcb.201002021. PubMed PMID: 20548099.
- 567 51.Lim YX, Ng YL, Tam JP, Liu DX. Human Coronaviruses: A Review of Virus-Host Interactions.  
568 *Diseases*. 2016;4(3):26. doi: 10.3390/diseases4030026. PubMed PMID: 28933406.
- 569 52.Nelemans T, Kikkert M. Viral Innate Immune Evasion and the Pathogenesis of Emerging RNA  
570 Virus Infections. *Viruses*. 2019;11(10):961. doi: 10.3390/v11100961. PubMed PMID: 31635238.
- 571 53.MC F, GR S. Evasion of Host Innate Immunity by Emerging Viruses: Antagonizing Host RIG-I  
572 Pathways. *J Emerg Dis Virol*. 2017;3(3):1-8.
- 573 54.Yount B, Roberts RS, Sims AC, Deming D, Frieman MB, Sparks J, et al. Severe Acute  
574 Respiratory Syndrome Coronavirus Group-Specific Open Reading Frames Encode Nonessential  
575 Functions for Replication in Cell Cultures and Mice. *Journal of Virology*. 2005;79(23):14909. doi:  
576 10.1128/JVI.79.23.14909-14922.2005.
- 577
- 578

579

580 **Figure captions**

581 **Fig 1. The HGS tree contains 200 SARS-CoV-2 genomes from China. Distance between leaves**  
582 **is the unweighted pair distance between the 10-ORF-HGS vector of genomes. The color bar**  
583 **represents the overall HGS value of each genome (weighted sum of ORF HGS). Out of a total**  
584 **of 200 viral genomes, 36 have unique ORF HGS values. The histogram at the top left shows**  
585 **the distribution of all genome HGS.**

586 **Fig 2. The HGS tree contains 1538 SARS-CoV-2 genomes from the USA. Distance between**  
587 **leaves is the unweighted pair distance between the 10-ORF-HGS vector of genomes. The color**  
588 **bar represents the overall HGS value of each genome (weighted sum of ORF HGS). Out of a**  
589 **total of 1538 viral genomes, 140 have unique ORF HGS values. The histogram at the top left**  
590 **shows the distribution of all genome HGS.**

591 **Fig 3. The HGS tree contains 856 SARS-CoV-2 genomes from Europe. Distance between**  
592 **leaves is the unweighted pair distance between the 10-ORF-HGS vector of genomes. The color**  
593 **bar represents the overall HGS value of each genome (weighted sum of ORF HGS). Out of a**  
594 **total of 856 viral genomes, 98 have unique ORF HGS values. The histogram at the top left**  
595 **shows the distribution of all genome HGS.**

596 **Fig 4. The HGS values of SARS-CoV-2 and SARS-CoV genes. ORF6 and ORF8 of SARS-**  
597 **CoV-2 have apparently higher mean HGS values than those of SARS-CoV, reaching 122%**  
598 **and 148% of that of SARS-CoV ORF6 and ORF8, respectively.**

599 **Fig 5. SARS-CoV induced immune response in host cells. Host cell detect virus invasion**

600 mainly by TLPs and RIG1/MDA5 and lead to type I IFN signaling pathway. The receptor  
601 IFNAR senses type I IFN and leads to the JAK1-STAT signaling pathway, which expresses  
602 antiviral proteins and bring neighboring cell into anti-virus state. The ORF6 suppresses type  
603 I IFN expression by inhibiting translocation of STAT1+STAT2+IRF9 complex into nucleus.  
604 ORF 6 also circumvent IFN production by inhibit IRF-3 phosphorylation in signaling  
605 pathway (TRAF3)-(TBK1+IKK $\epsilon$ )-(IRF3)-(IFN $\beta$ ). The expression of ORF8b and 8ab enhance  
606 the IRF3 degradation, thus regulating immune functions of IRF3.

607 **Fig 6. Inhibition of a promoter containing an ISRE by SARS-CoV proteins with different**  
608 **genome HGS values. Cells were cotransfected with the SARS-CoV proteins and either**  
609 **infected with Sendai virus (S. virus) or treated with IFN $\beta$  after 24 hours. The expression of**  
610 **the promoter decays rapidly with the increasing HGS of ORF 3b, ORF 6 and N, conforming**  
611 **to a power law.**

612 **Fig 7. Mutation profile for SARS-CoV-2 genomes (geolocation of China) with different HGS.**  
613 **Out of a total of 200 viral genomes, 36 genomes have unique HGS values. A total of 74**  
614 **mutations were identified in all the genomes. The top 7 conserved mutations with were shown**  
615 **with special markers at the top of colored blocks representing ORFs. Mutation 10818G>T in**  
616 **ORF1ab (codon TTG>TTT) occurred in populations with high HGS, which results in amino**  
617 **acid M37F mutation in transmembrane protein nsp6. The mutation rarely occurred in**  
618 **populations with low/moderate HGS.**

619 **Fig 8. Mutation profile for SARS-CoV-2 genomes (geolocation of the USA) with different**  
620 **HGS. Out of a total of 1538 viral genomes, 140 genomes have unique HGS values. A total of**  
621 **162 mutations were identified in all the genomes. The top 7 conserved mutations with were**

622 shown with special markers at the top of colored blocks representing ORFs. Mutation  
623 10818G>T in ORF1ab (codon TTG>TTT) occurred in populations with high HGS, which  
624 results in amino acid M37F mutation in transmembrane protein nsp6. The mutation rarely  
625 occurred in populations with low/moderate HGS.

626 **Fig 9. Mutation profile for SARS-CoV-2 genomes (geolocation of Europe) with different HGS.**  
627 **Out of a total of 856 viral genomes, 98 genomes have unique HGS values. A total of 145**  
628 **mutations were identified in all the genomes. The top 7 conserved mutations with were shown**  
629 **with special markers at the top of colored blocks representing ORFs. Mutation 10818G>T in**  
630 **ORF1ab (codon TTG>TTT) occurred in populations with high HGS, which results in amino**  
631 **acid M37F mutation in transmembrane protein nsp6. The mutation rarely occurred in**  
632 **populations with low/moderate HGS.**

633 **Fig 10. Highly conserved mutations identified in SARS-CoV-2 genomes with geolocations of**  
634 **China, the USA and Europe. The three regions have different sets of mutations. The TTT (F,**  
635 **Phenylalanine) mutation occurred in all three regions. TTT represents the mutation**  
636 **10818G>T(TTG>TTT) in ORF1ab. The F in the circle represents the amino acid mutation**  
637 **M37F (Methionine to Phenylalanine) in nonstructural protein nsp6. The P, H, +, - and S in**  
638 **brackets in the legend represent polar, hydrophobic, positively charged, negatively charged**  
639 **and special residues, respectively.**

640 **Fig 11. The topology of transmembrane protein nsp6 and the identified M37F mutation**  
641 **located in a loop between the first and second transmembrane domains on the N-terminal**  
642 **side.**

643

644 **Supporting information**

645 **Dataset S1 (separate file).** The accession number and corresponding HGS of 200 SARS-CoV-2  
646 genomes with geolocation of China. Filename is DatasetS1\_China\_SARS-CoV-  
647 2\_nstrain200\_ORFHGS\_allinone.xls. The file contains accession ID, collection date, location,  
648 HGS values for 10 ORFs (ORF1ab, S, ORF3a, E, M, ORF6, ORF7a, ORF7b, ORF8, and N) and  
649 the weighted HGS of the whole genome.

650 **Dataset S2 (separate file).** The accession number and corresponding HGS of 1538 SARS-CoV-2  
651 genomes with geolocation of the USA. Filename is DatasetS2\_USA\_SARS-CoV-  
652 2\_nstrain1538\_ORFHGS\_allinone.xls. The file contains accession ID, collection date, location,  
653 HGS values for 10 ORFs (ORF1ab, S, ORF3a, E, M, ORF6, ORF7a, ORF7b, ORF8, and N) and  
654 the weighted HGS of the whole genome.

655 **Dataset S3 (separate file).** The accession number and corresponding HGS of 856 SARS-CoV-2  
656 genomes with geolocation of Europe. Filename is DatasetS3\_Europe\_SARS-CoV-  
657 2\_nstrain856\_ORFHGS\_allinone.xls. The file contains accession ID, collection date, location,  
658 HGS values for 10 ORFs (ORF1ab, S, ORF3a, E, M, ORF6, ORF7a, ORF7b, ORF8, and N) and  
659 the weighted HGS of the whole genome.

660 **Dataset S4 (separate file).** The accession number and corresponding HGS of 25 SARS-CoV  
661 genomes. Filename is DatasetS4\_SARS-CoV\_nstrain25\_ORFHGS\_allinone.xls. The file  
662 contains accession ID, HGS values for 10 ORFs (ORF1ab, S, ORF3a, E, M, ORF6, ORF7a,  
663 ORF7b, ORF8, and N) and the weighted HGS of the whole genome.

664

665



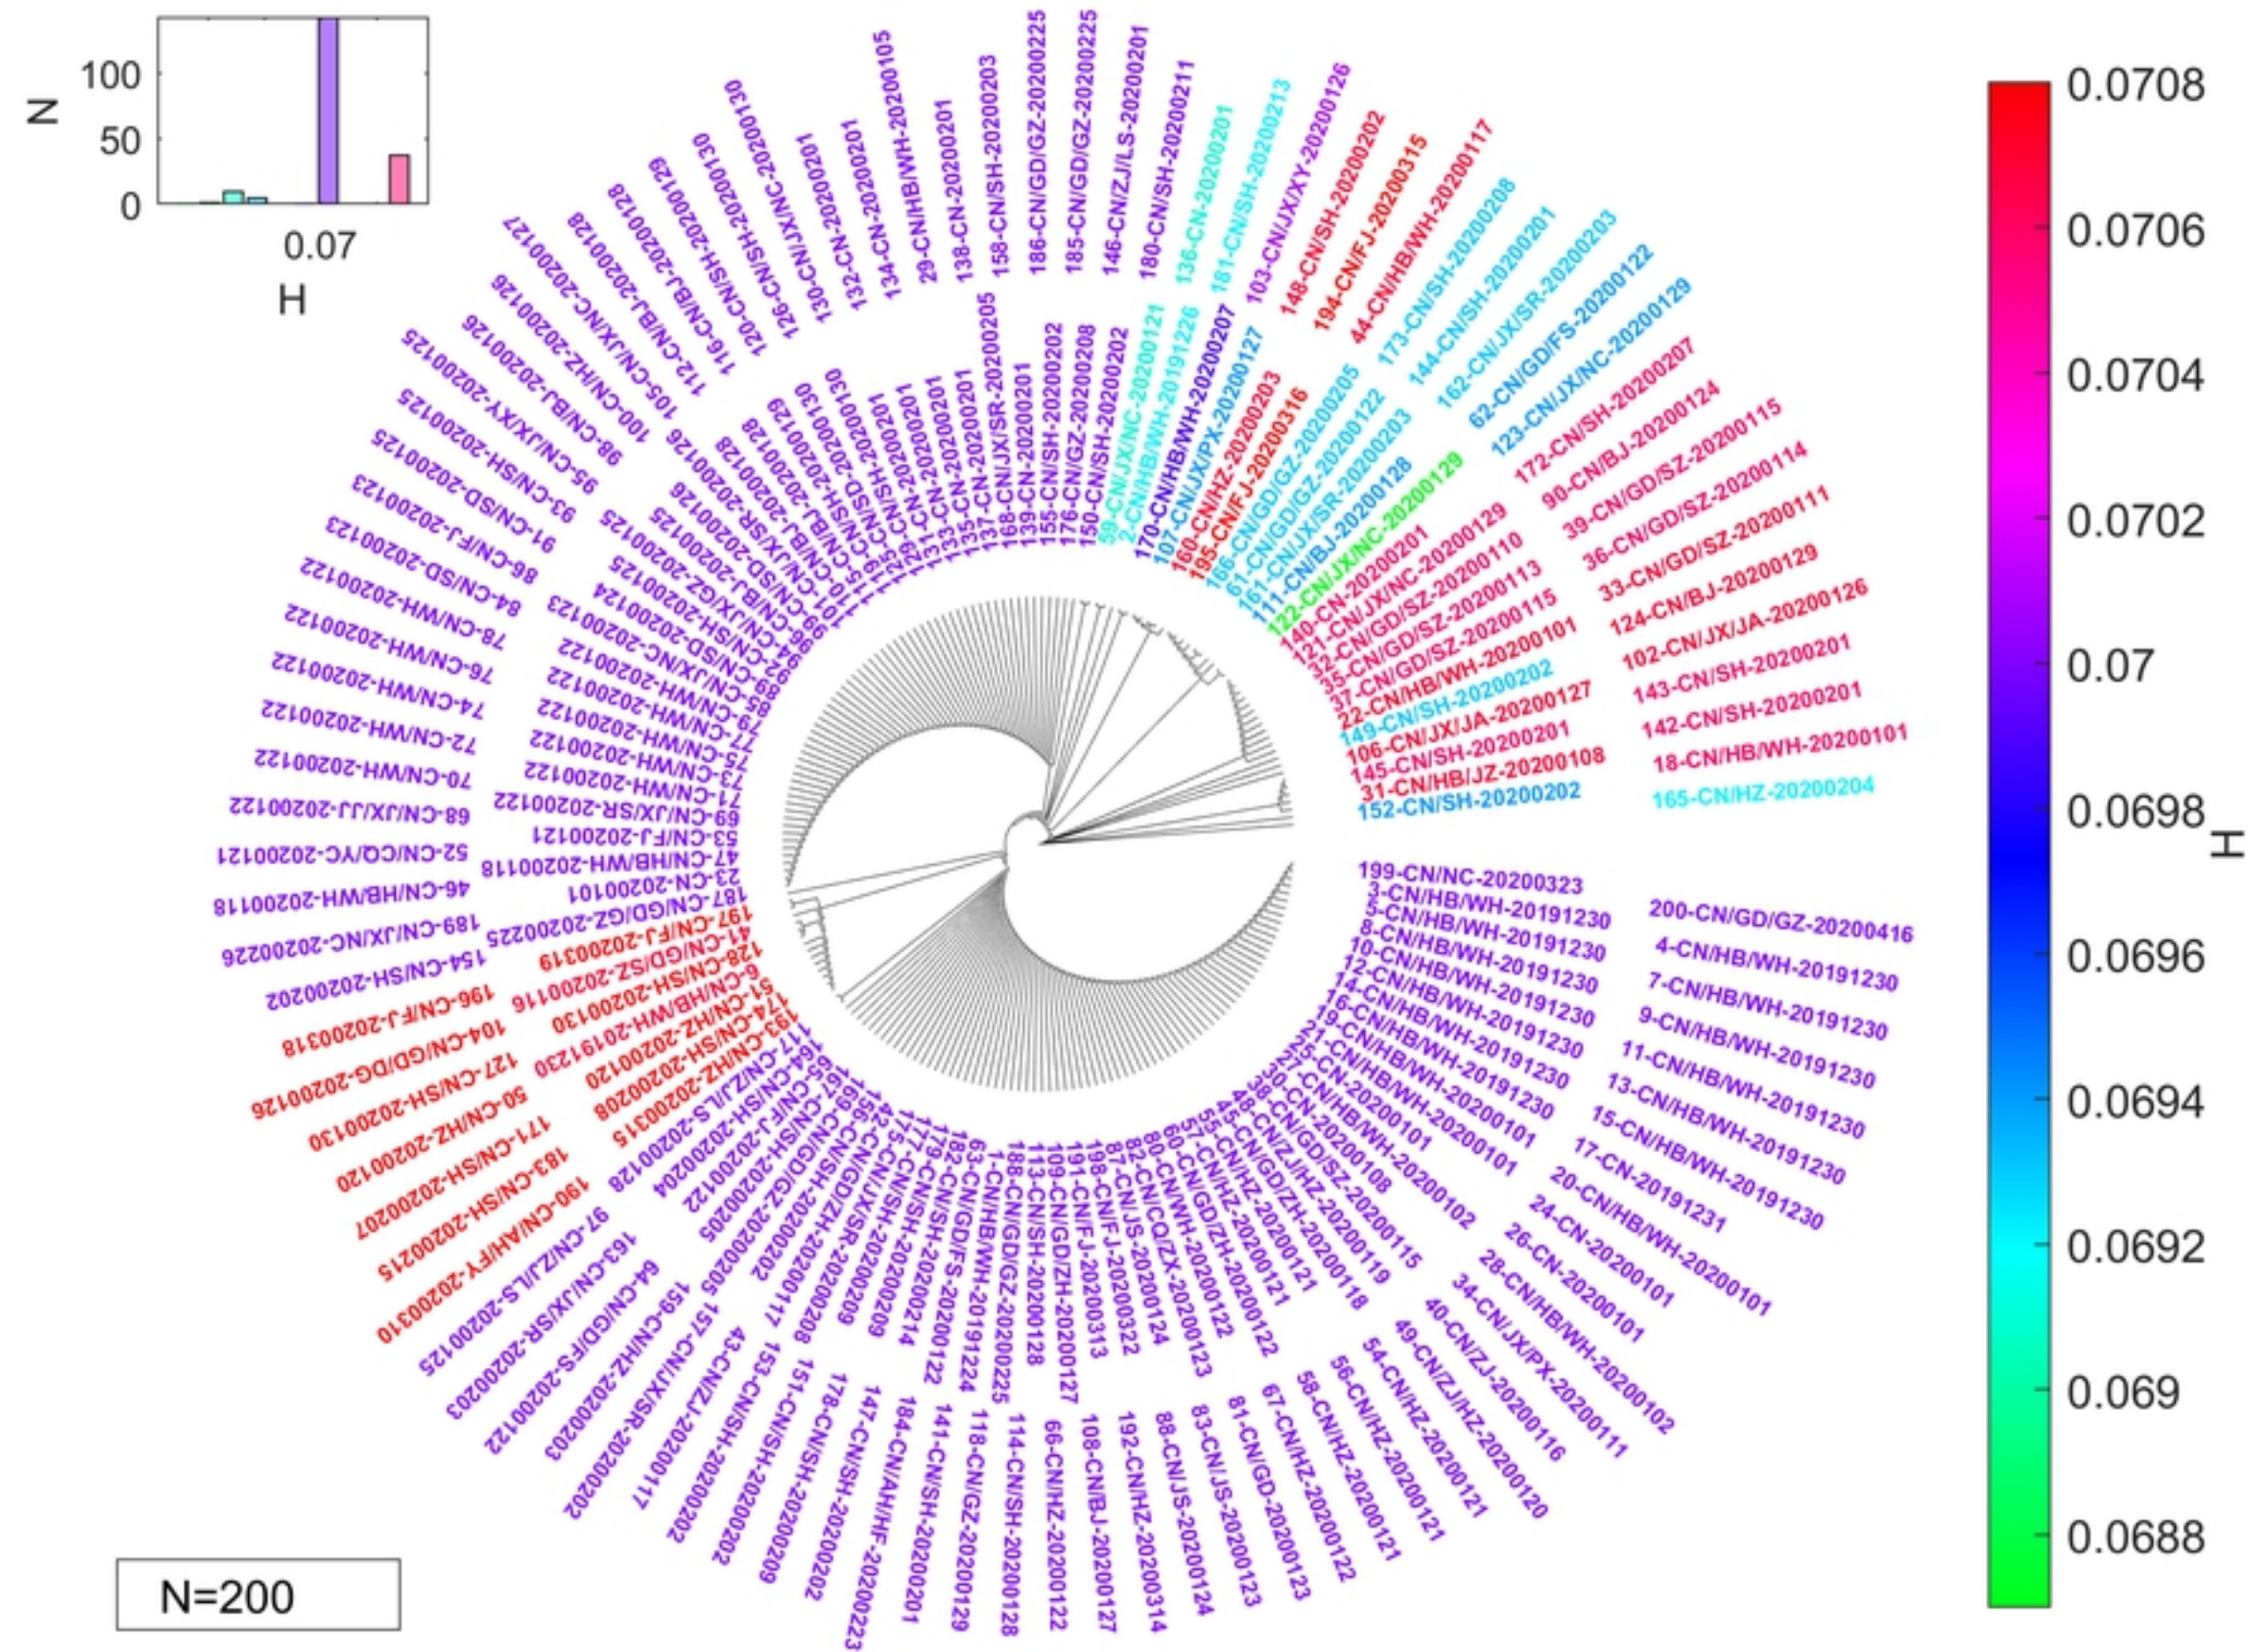

Fig1

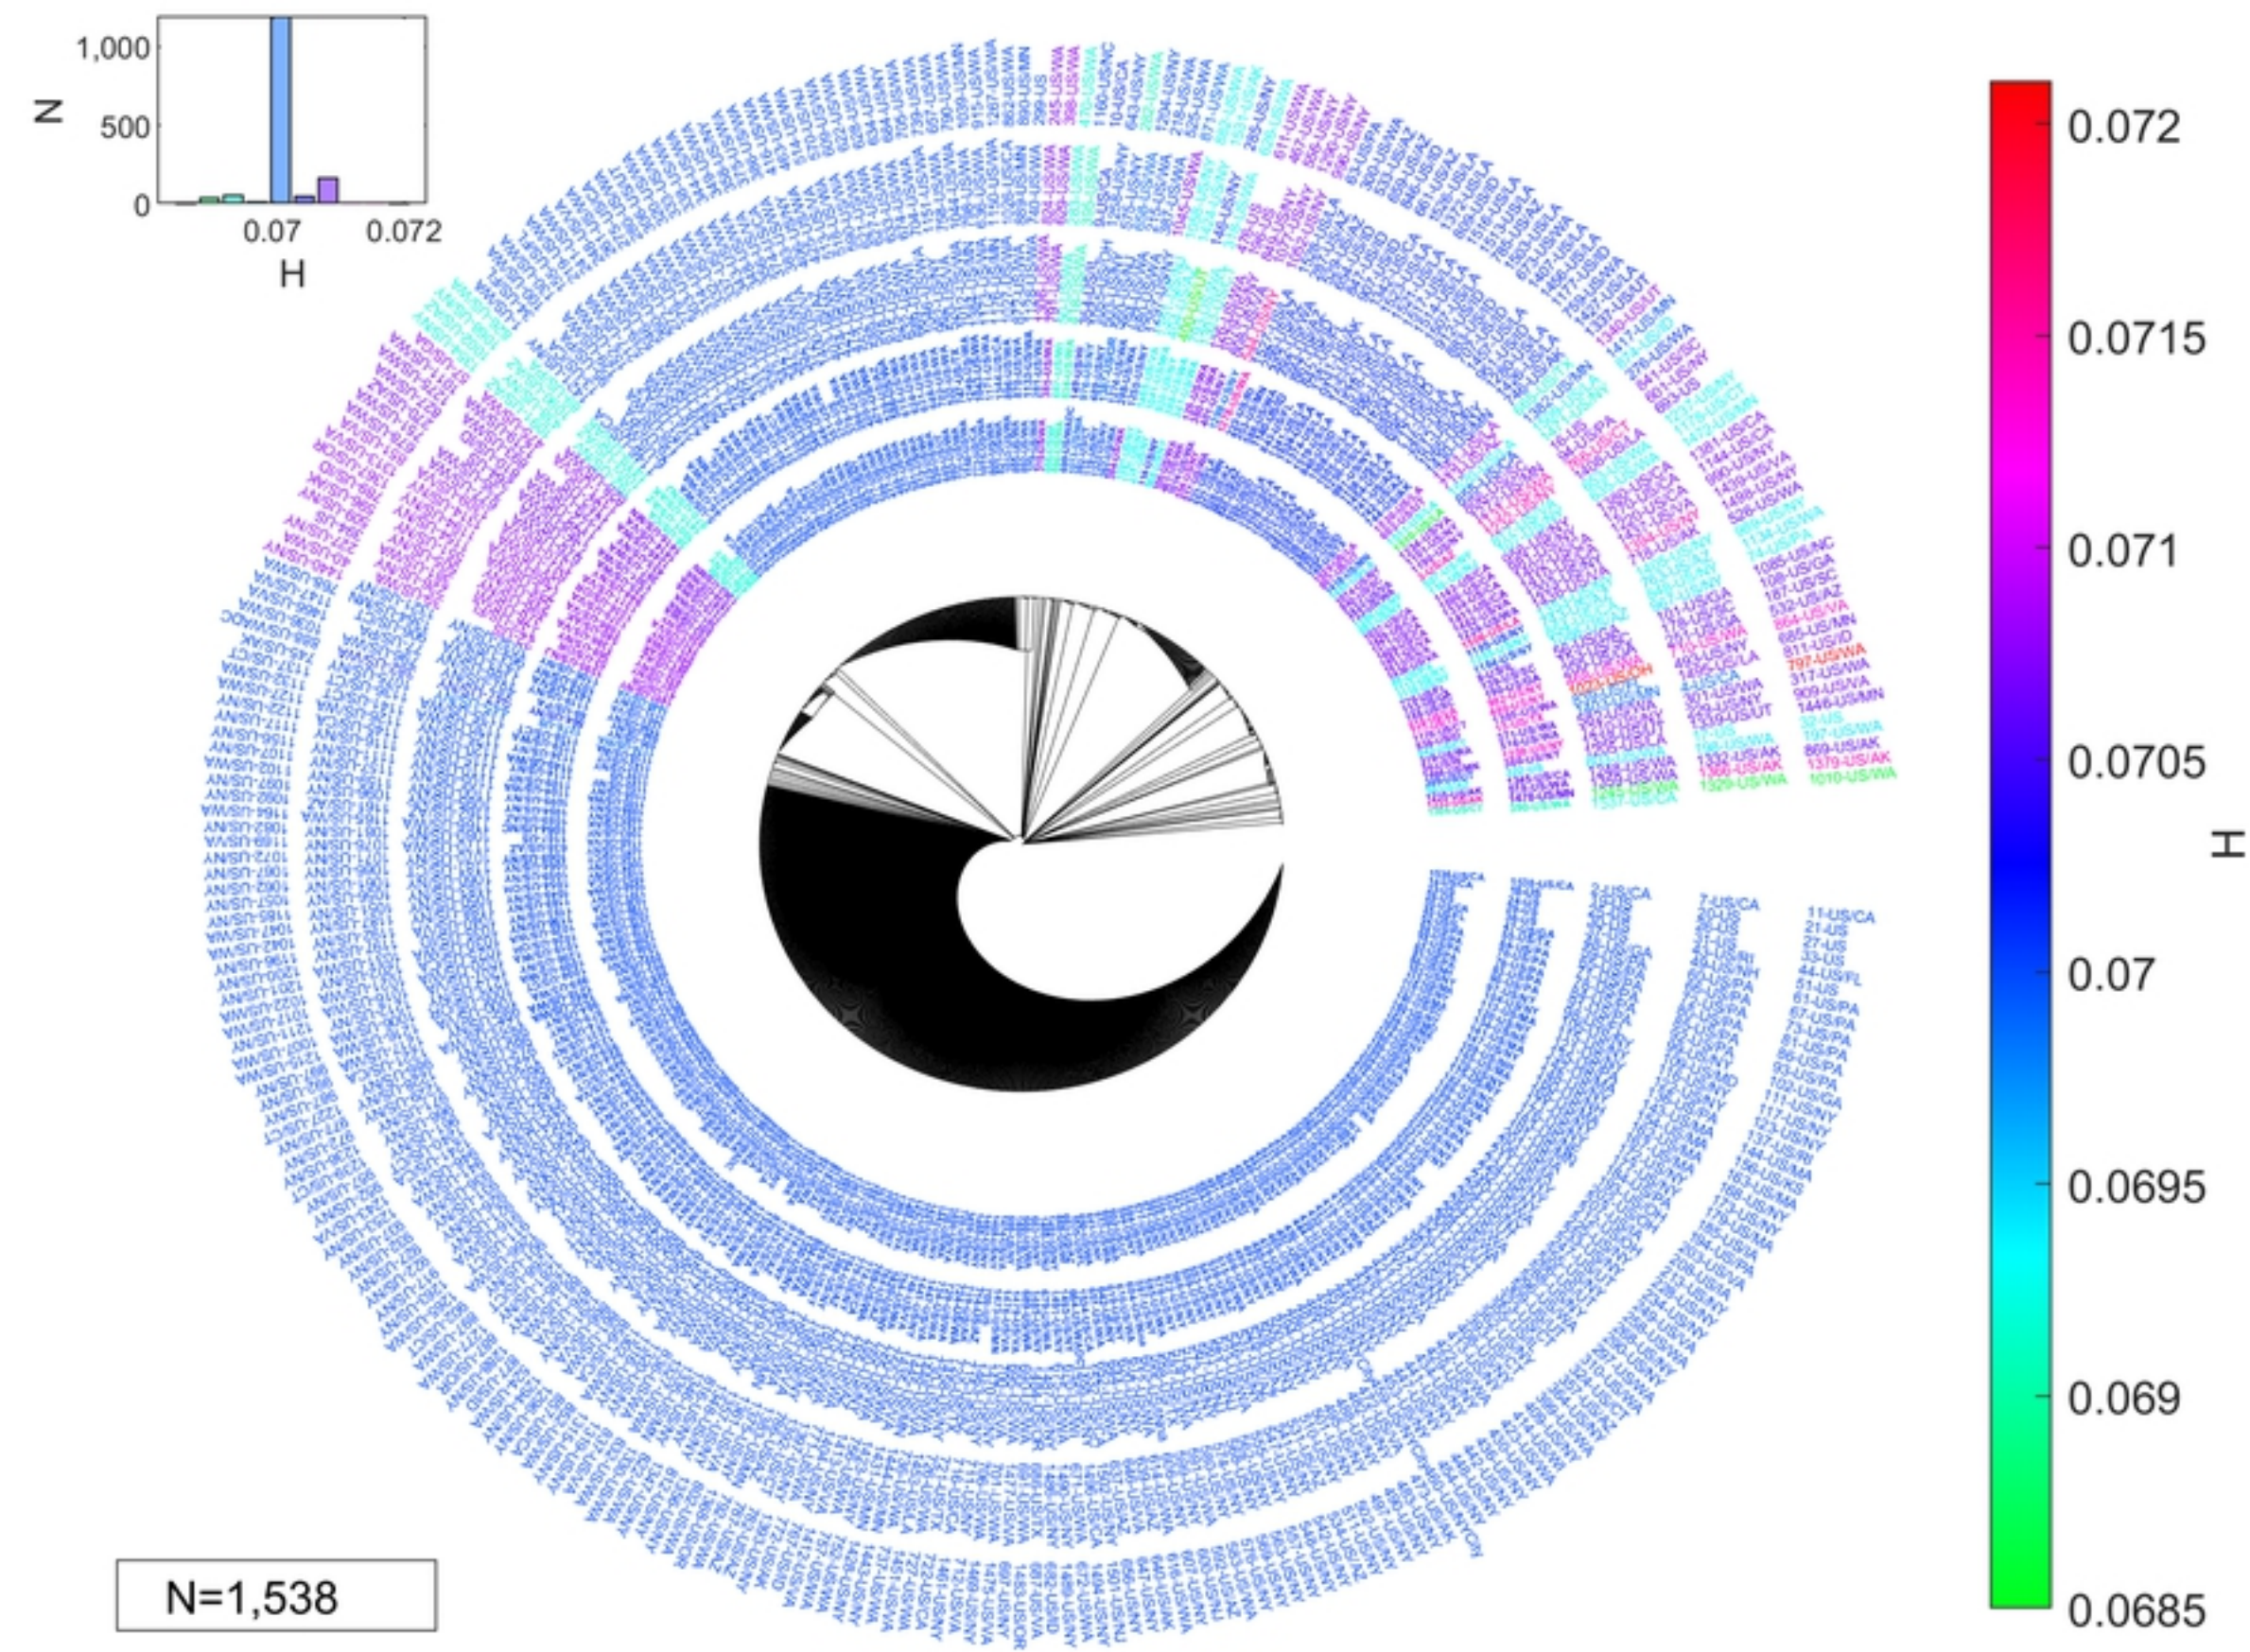

Fig2

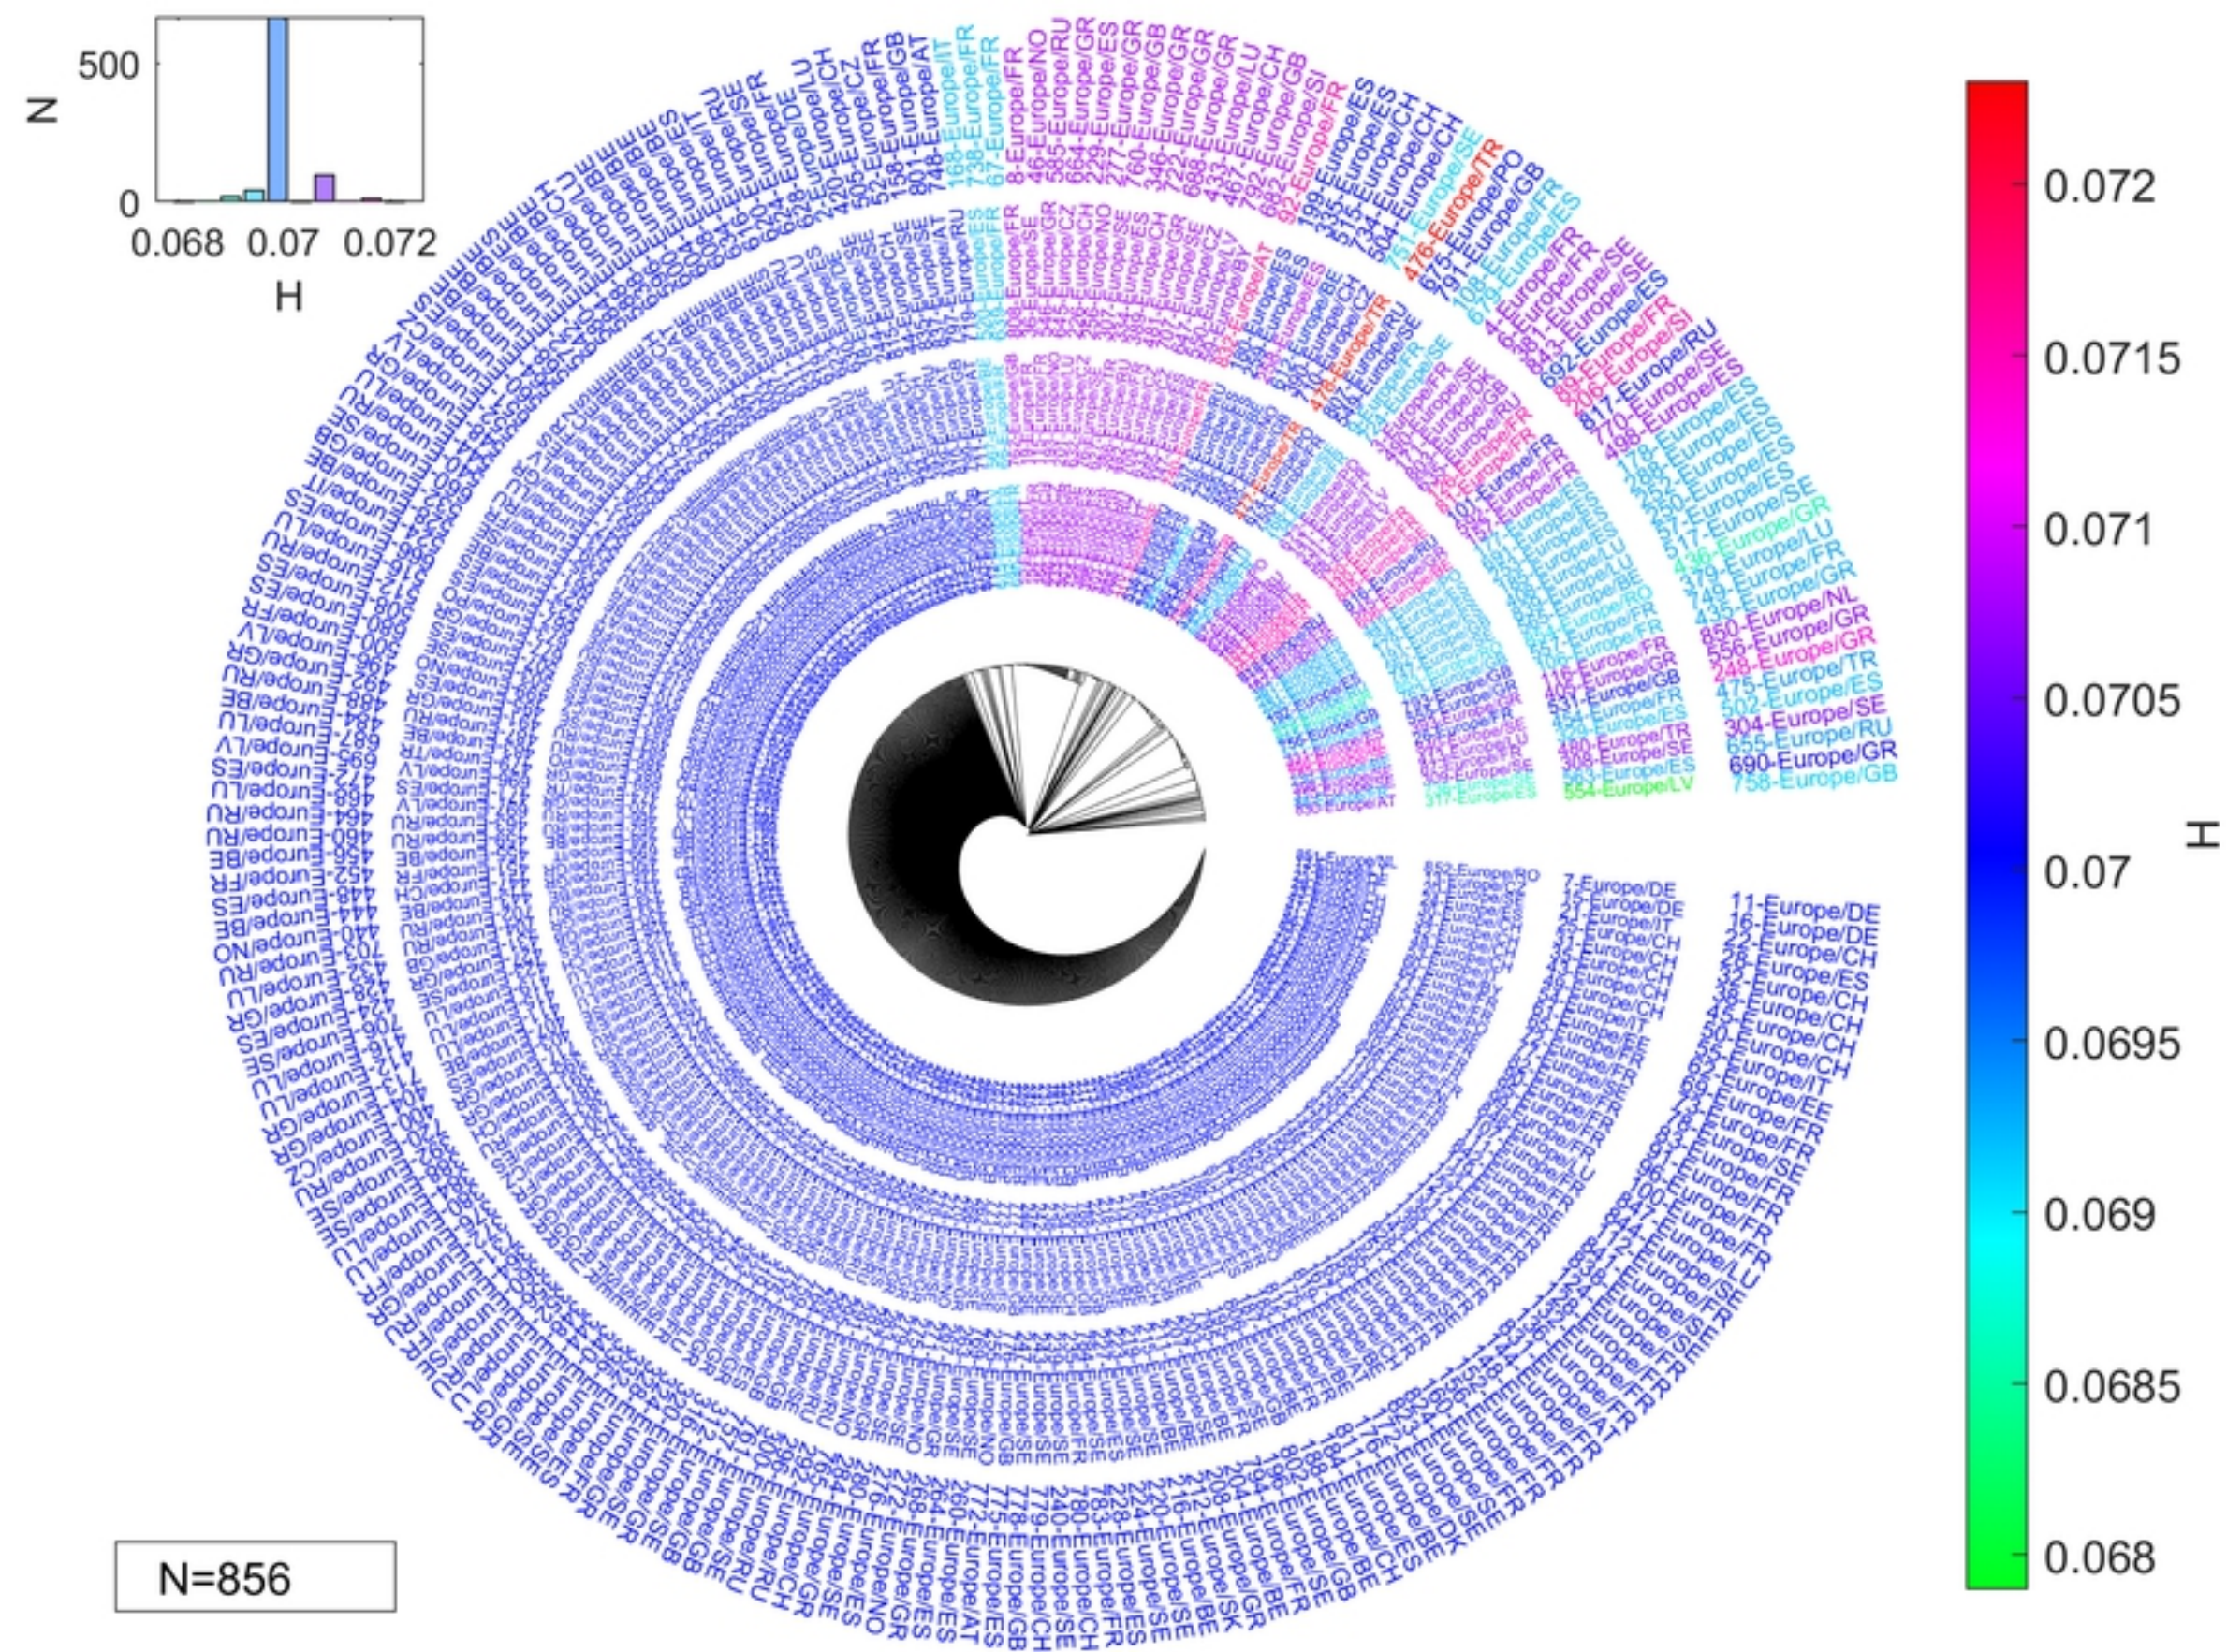

Fig3

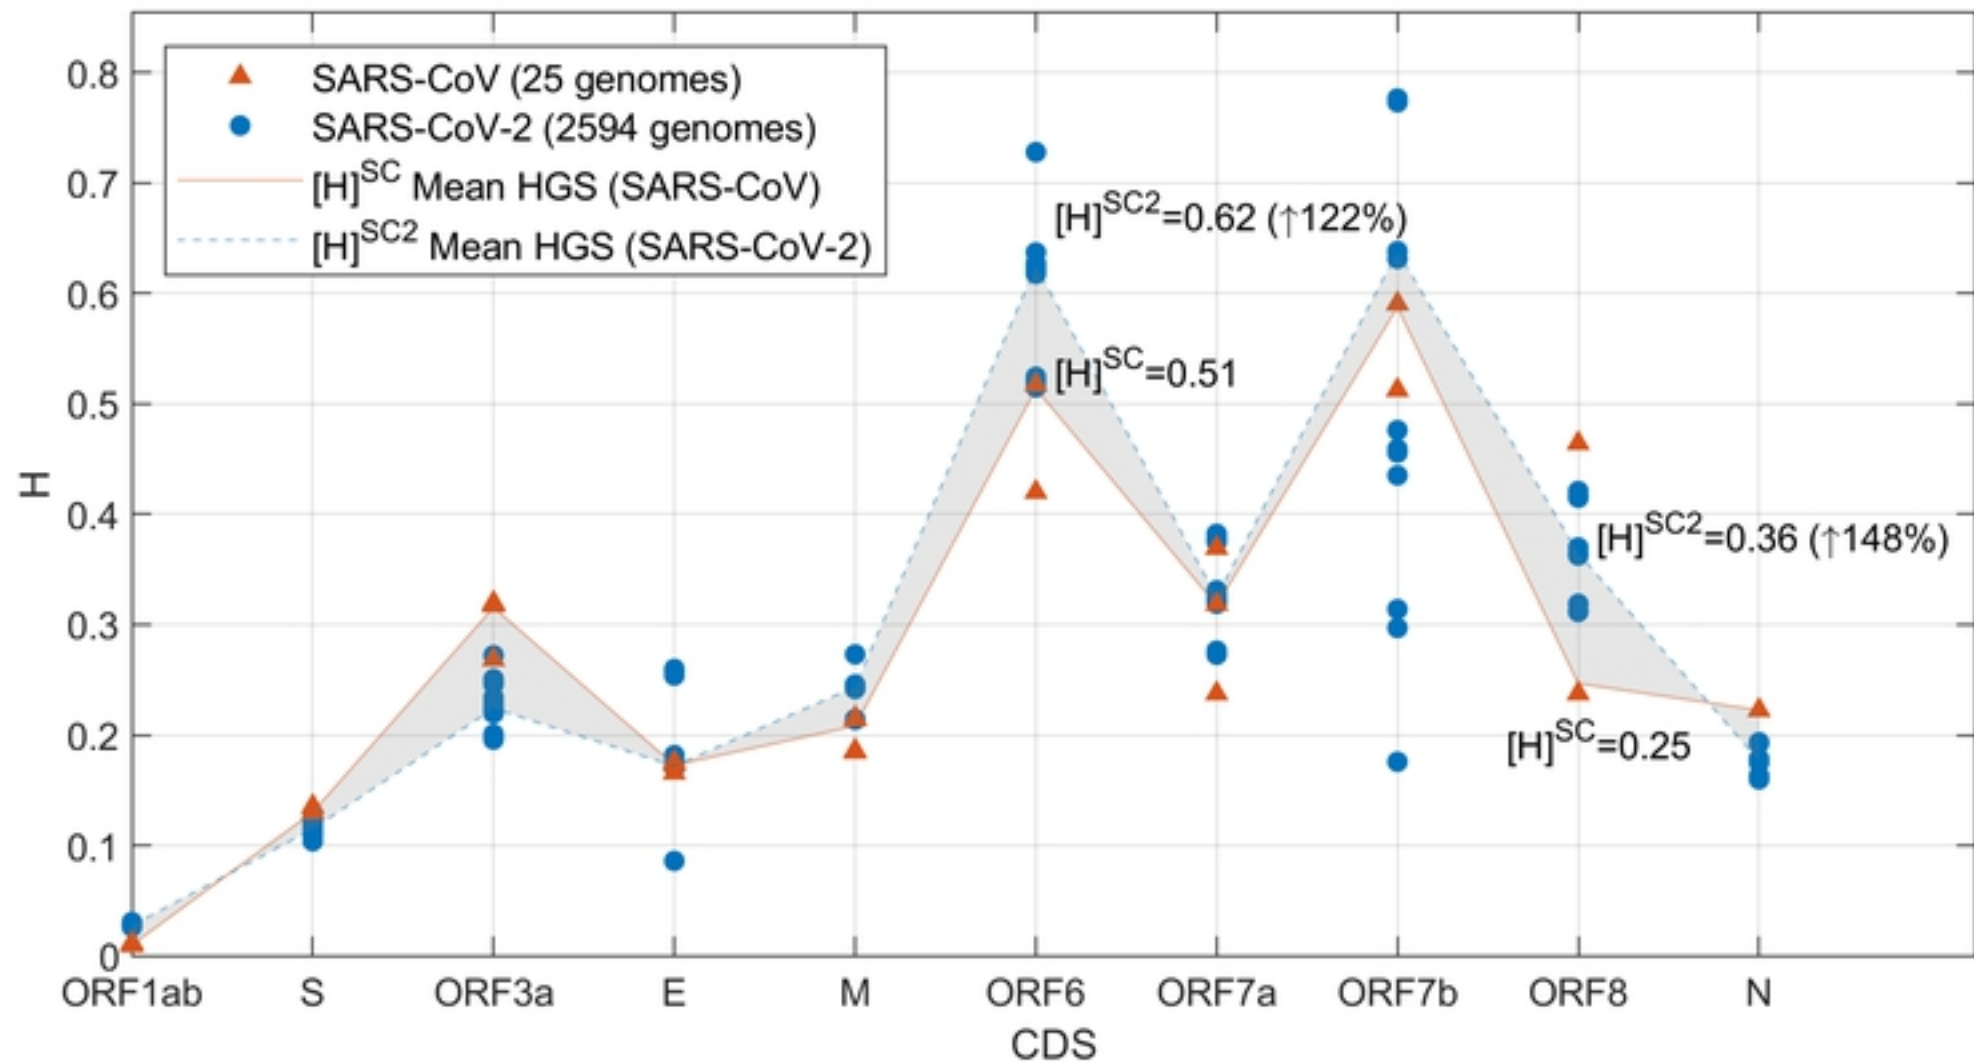

Fig4

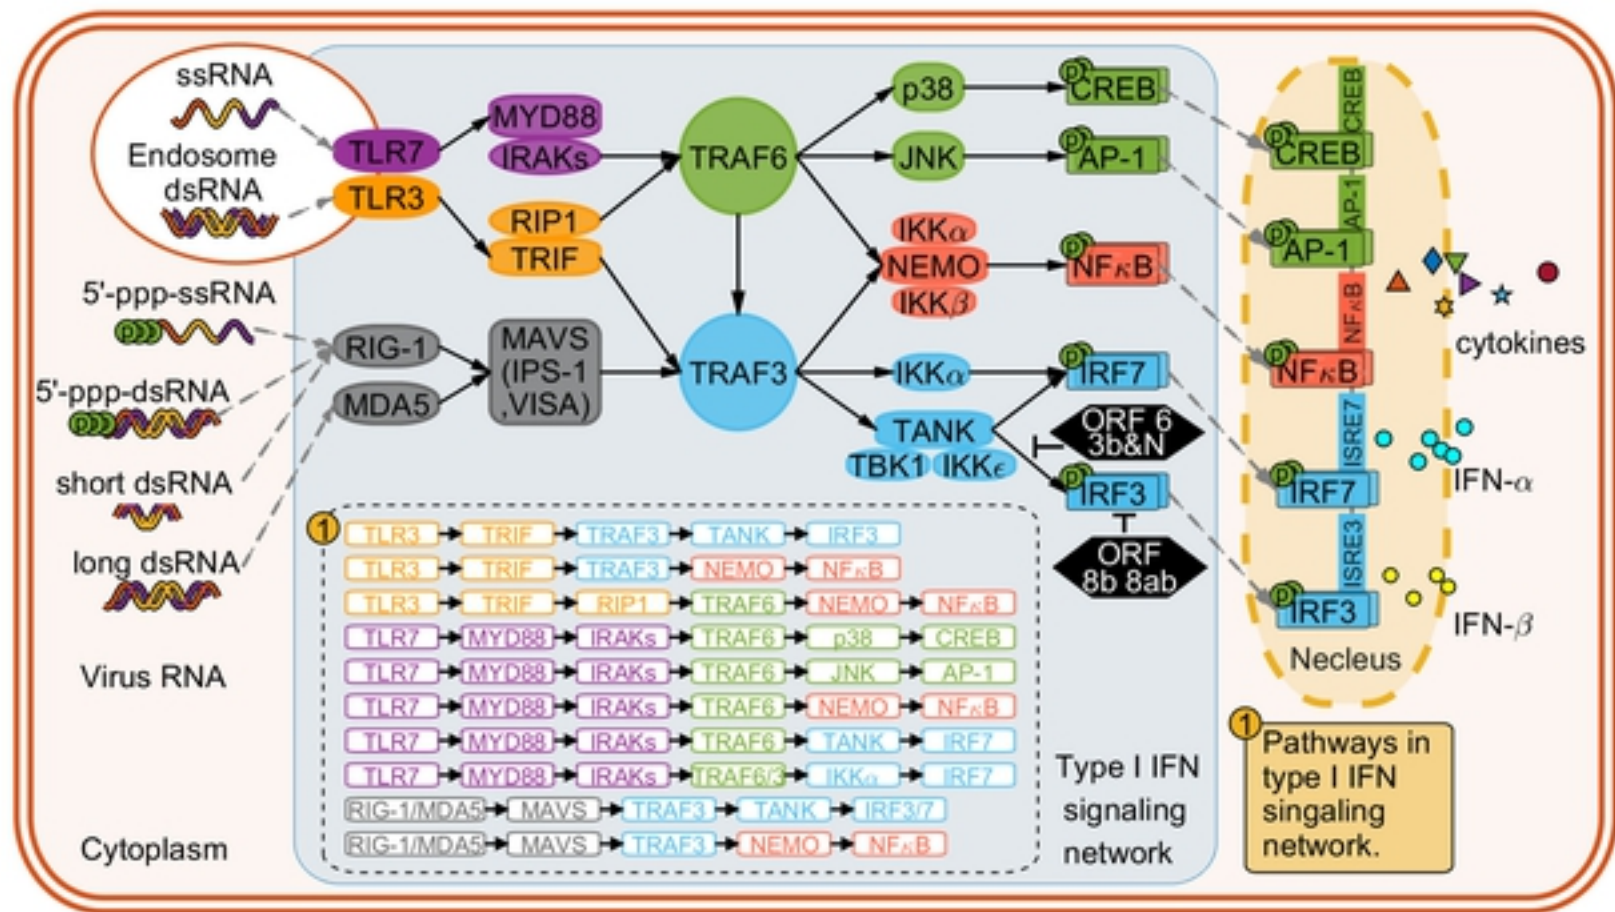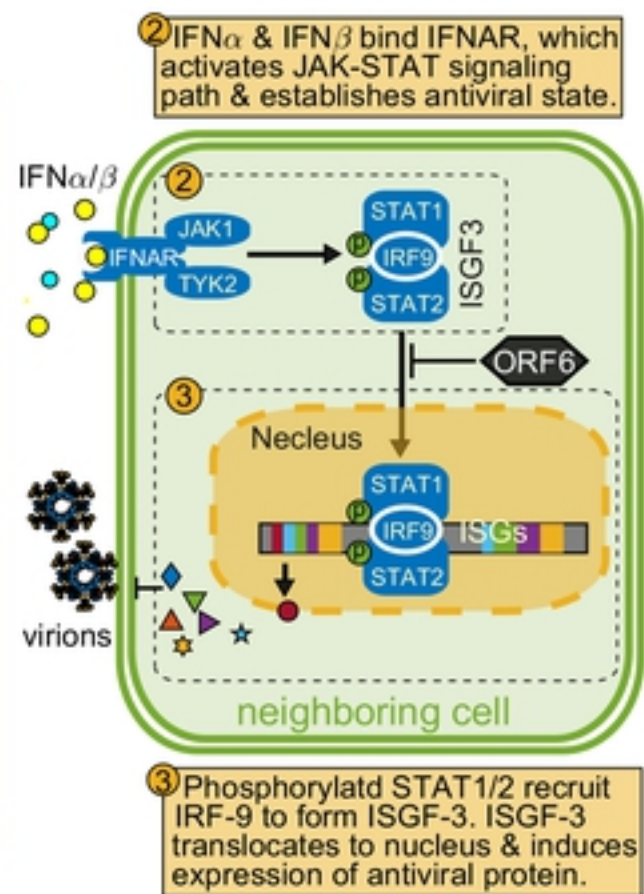

Fig5

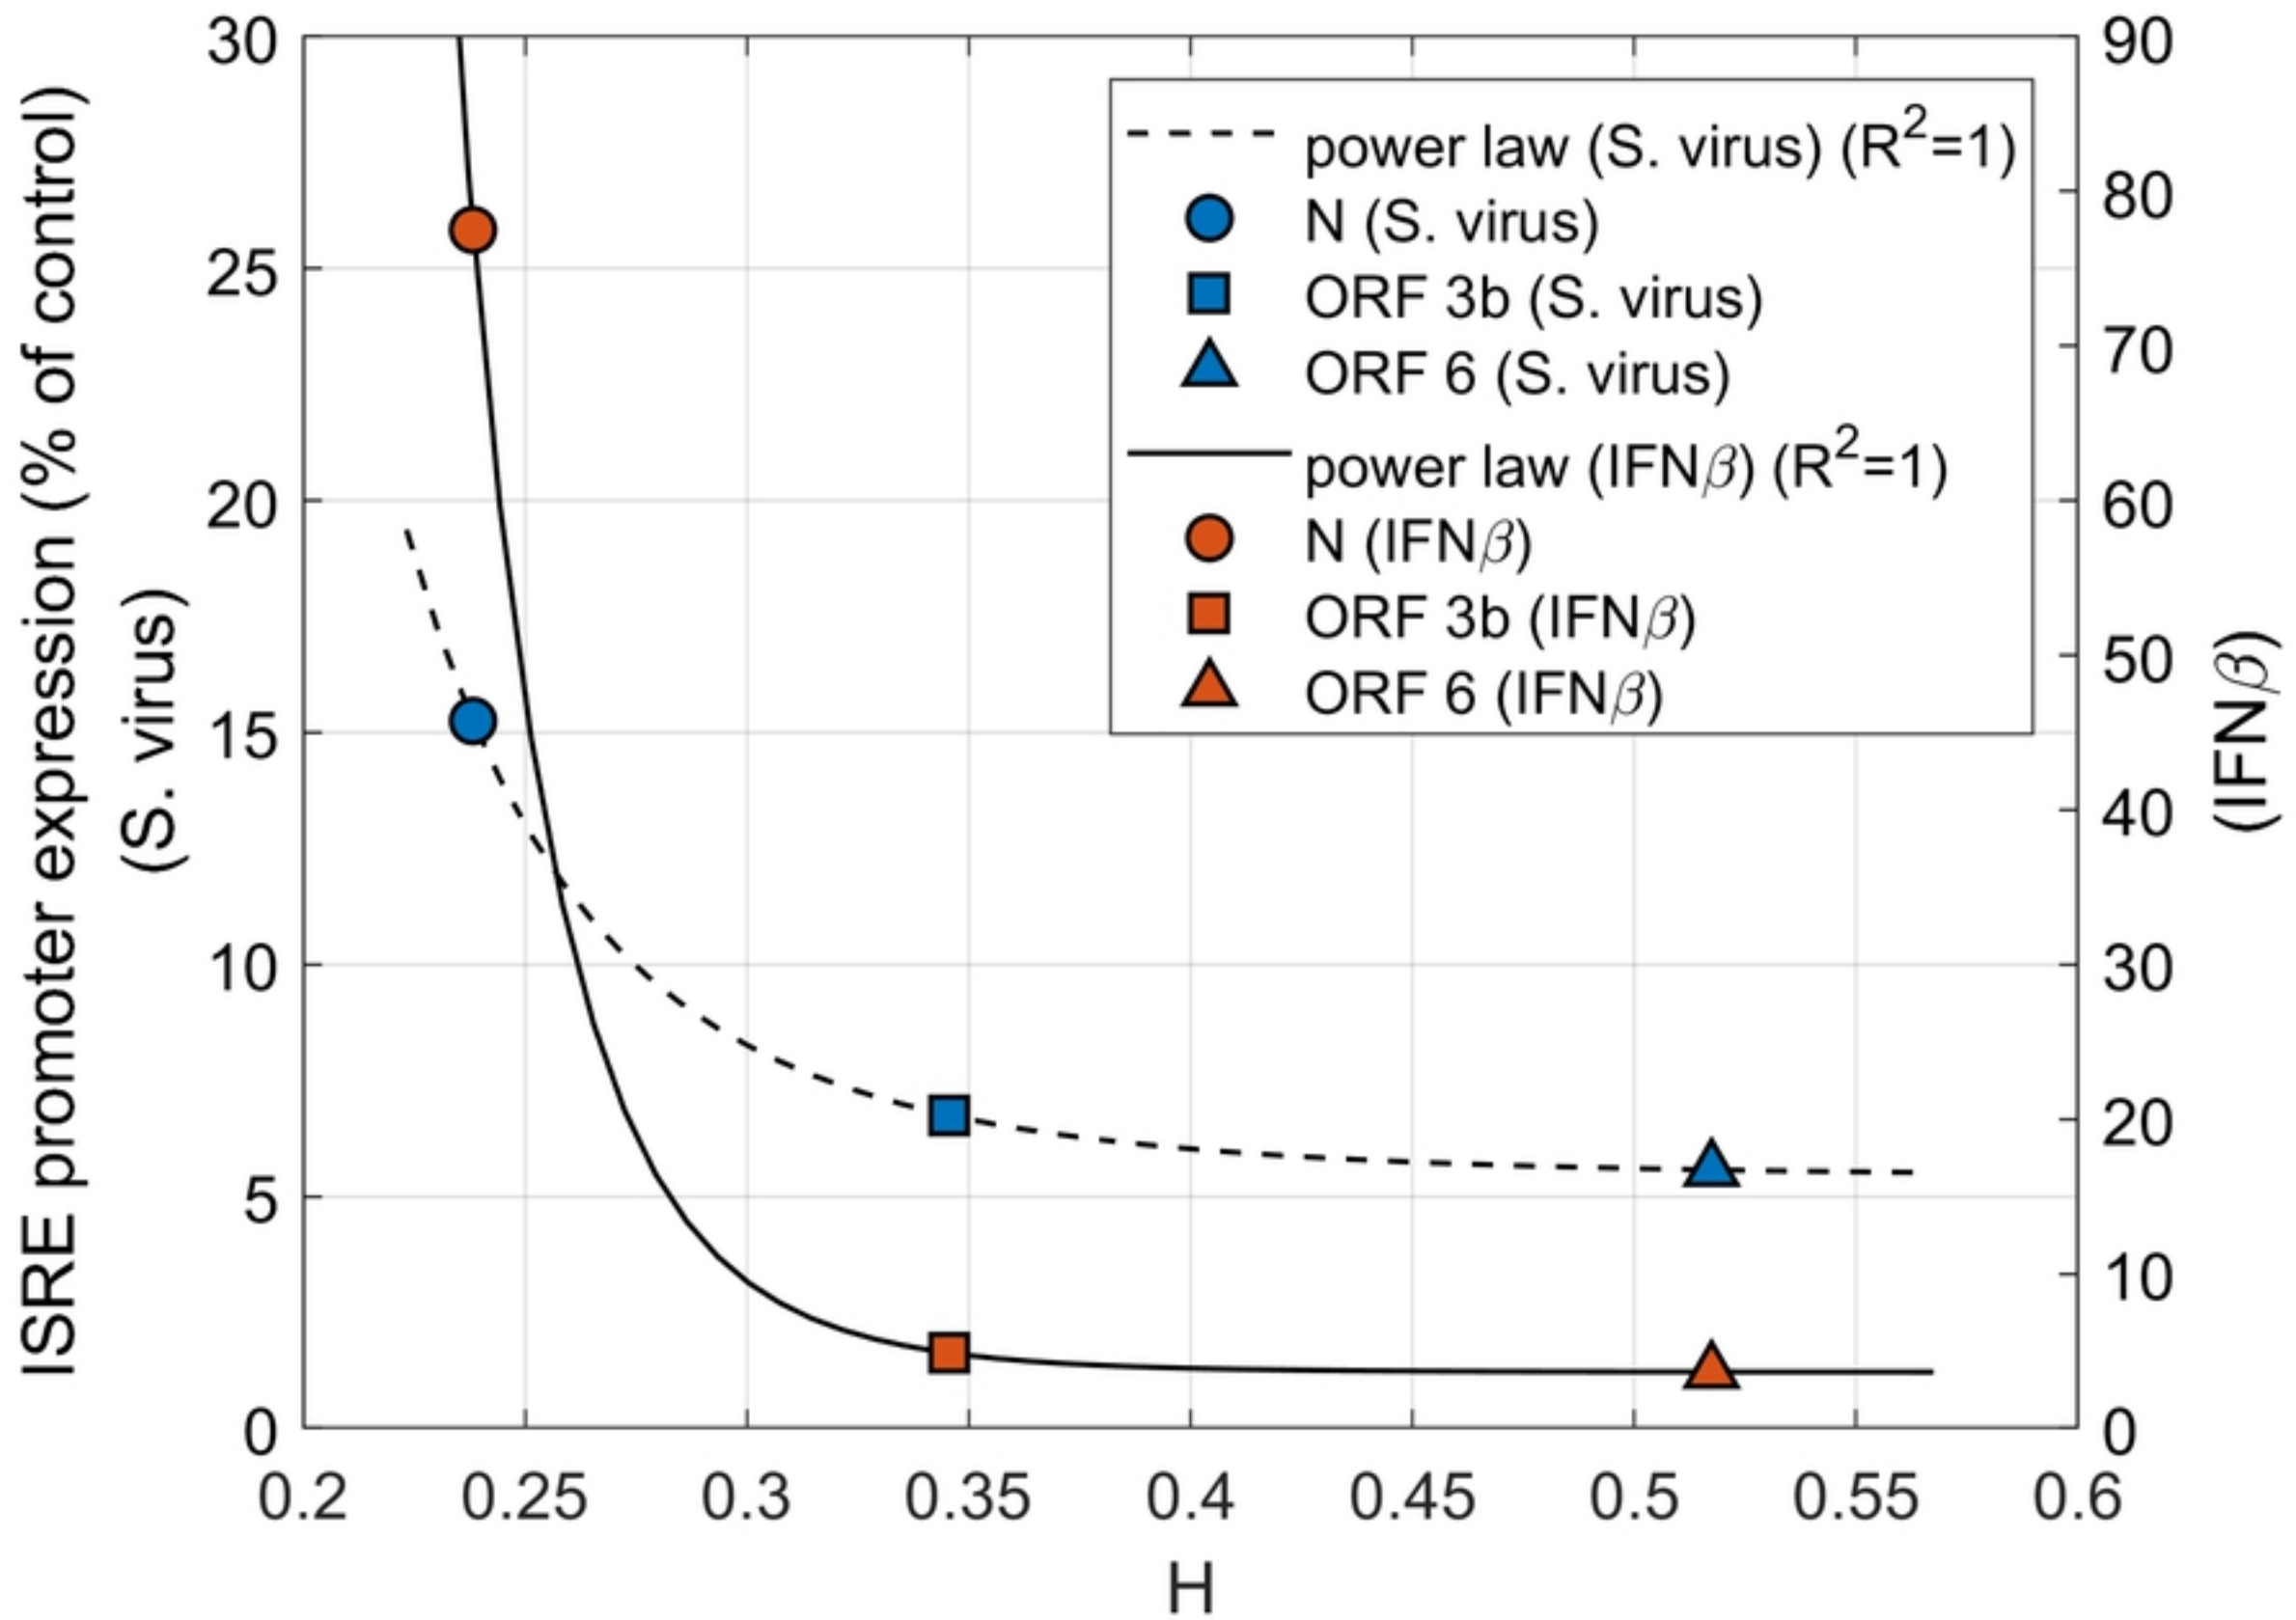

Fig6

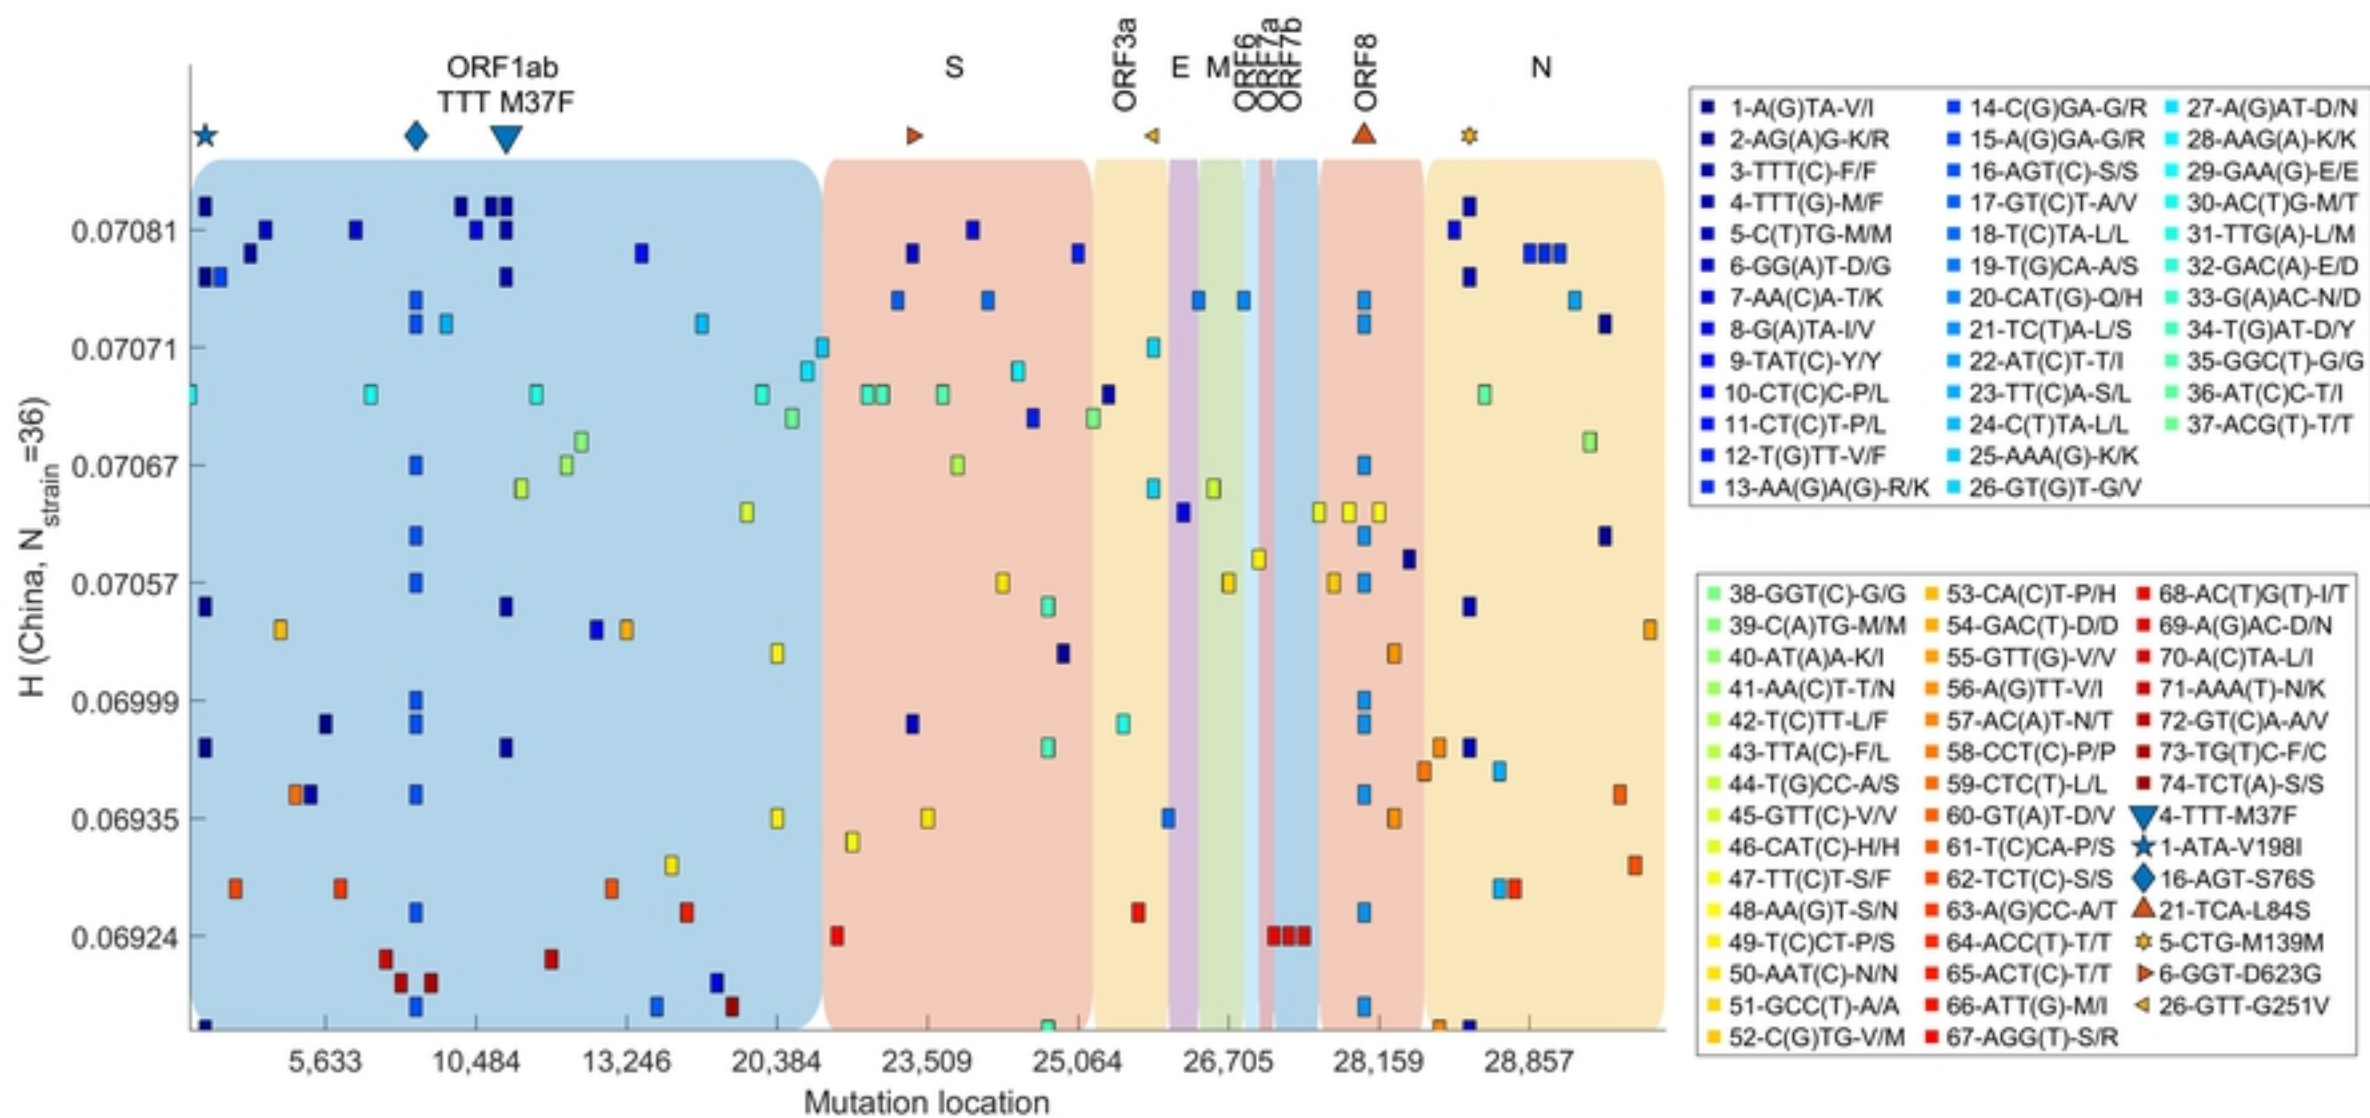

Fig7

H (USA, N<sub>strain</sub>=140)

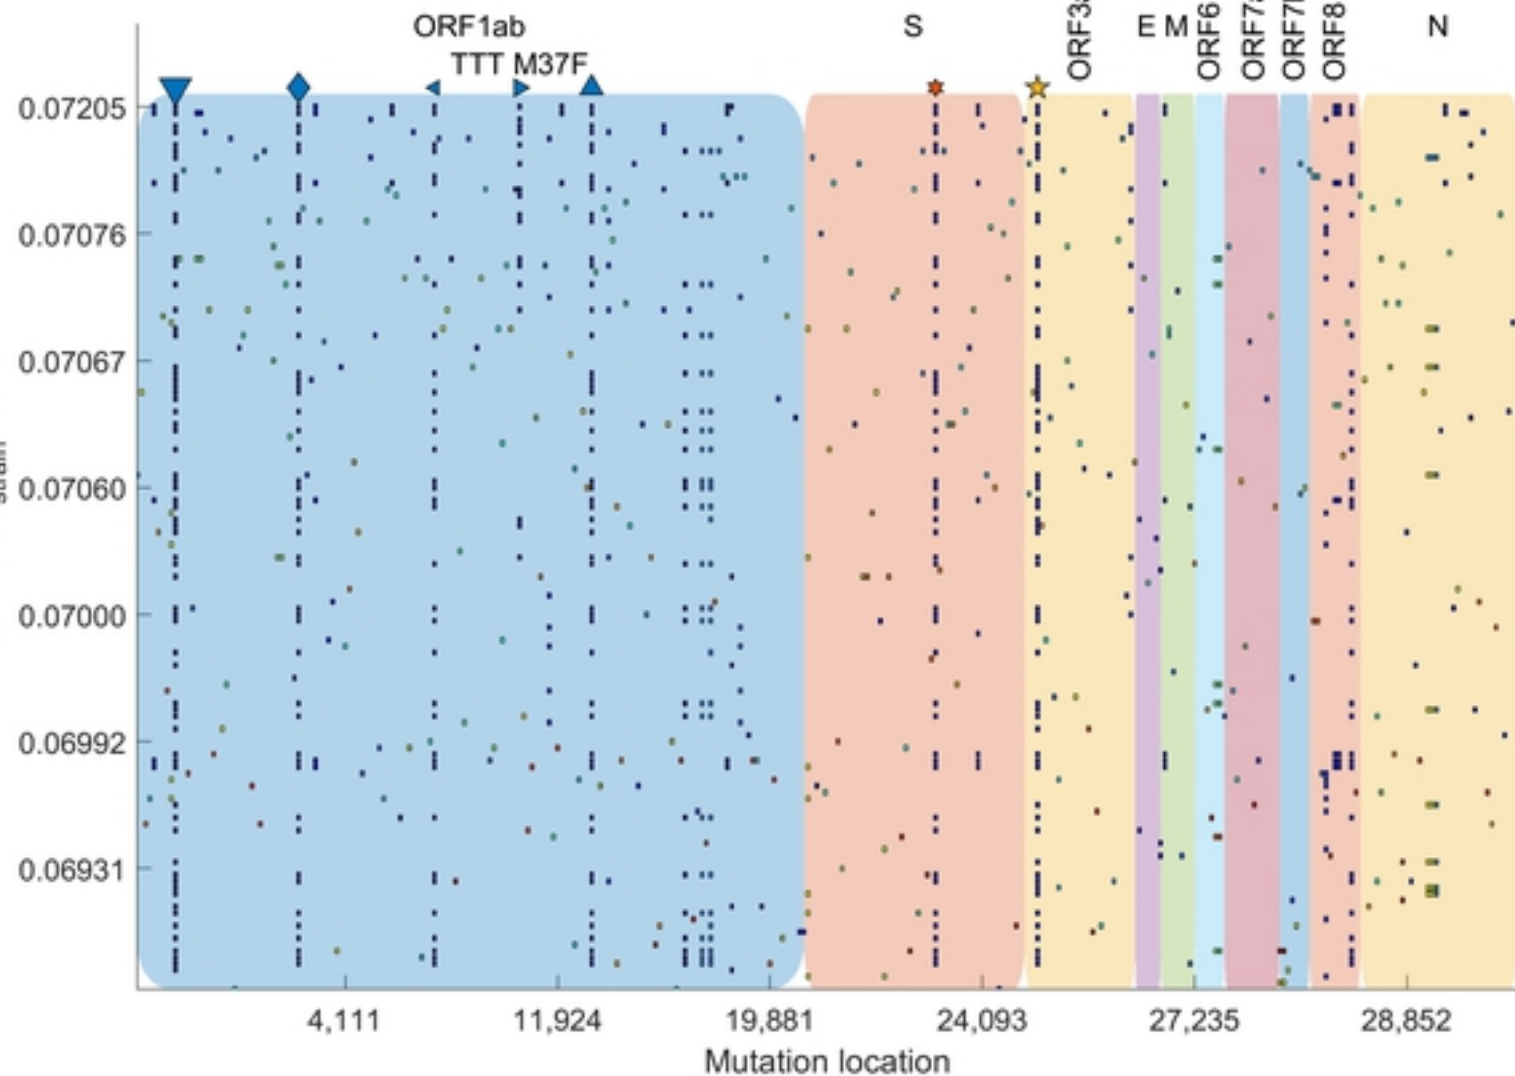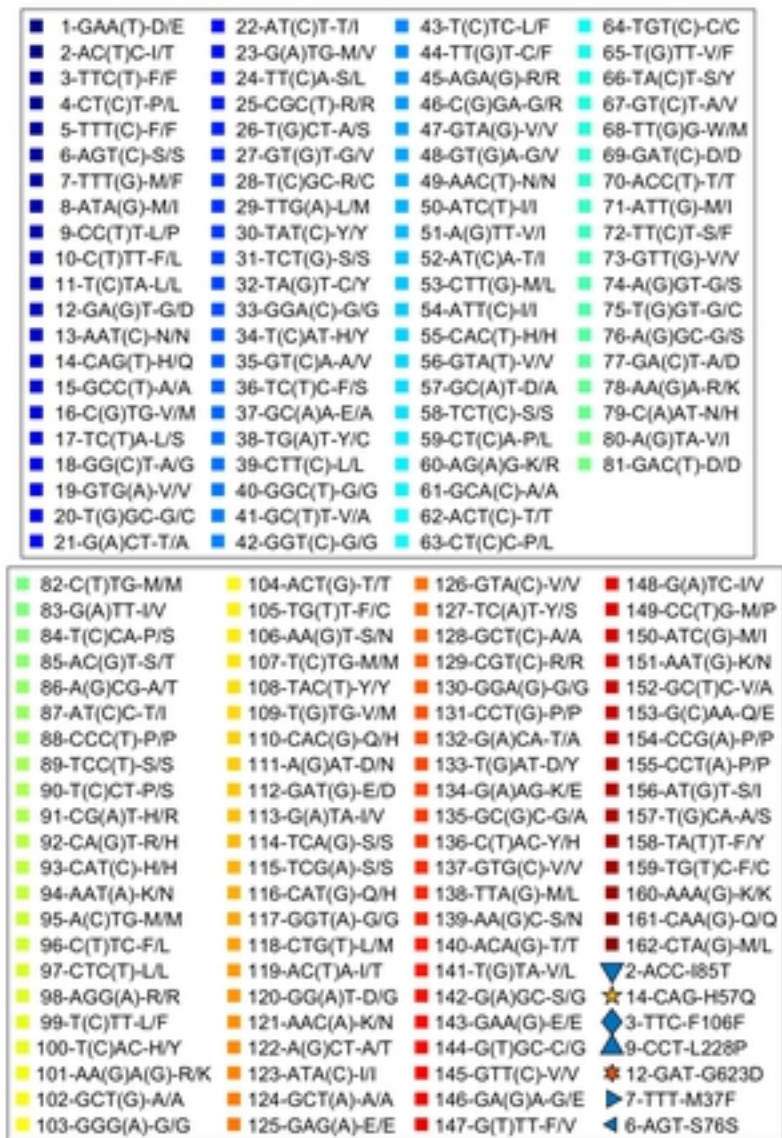

Fig8



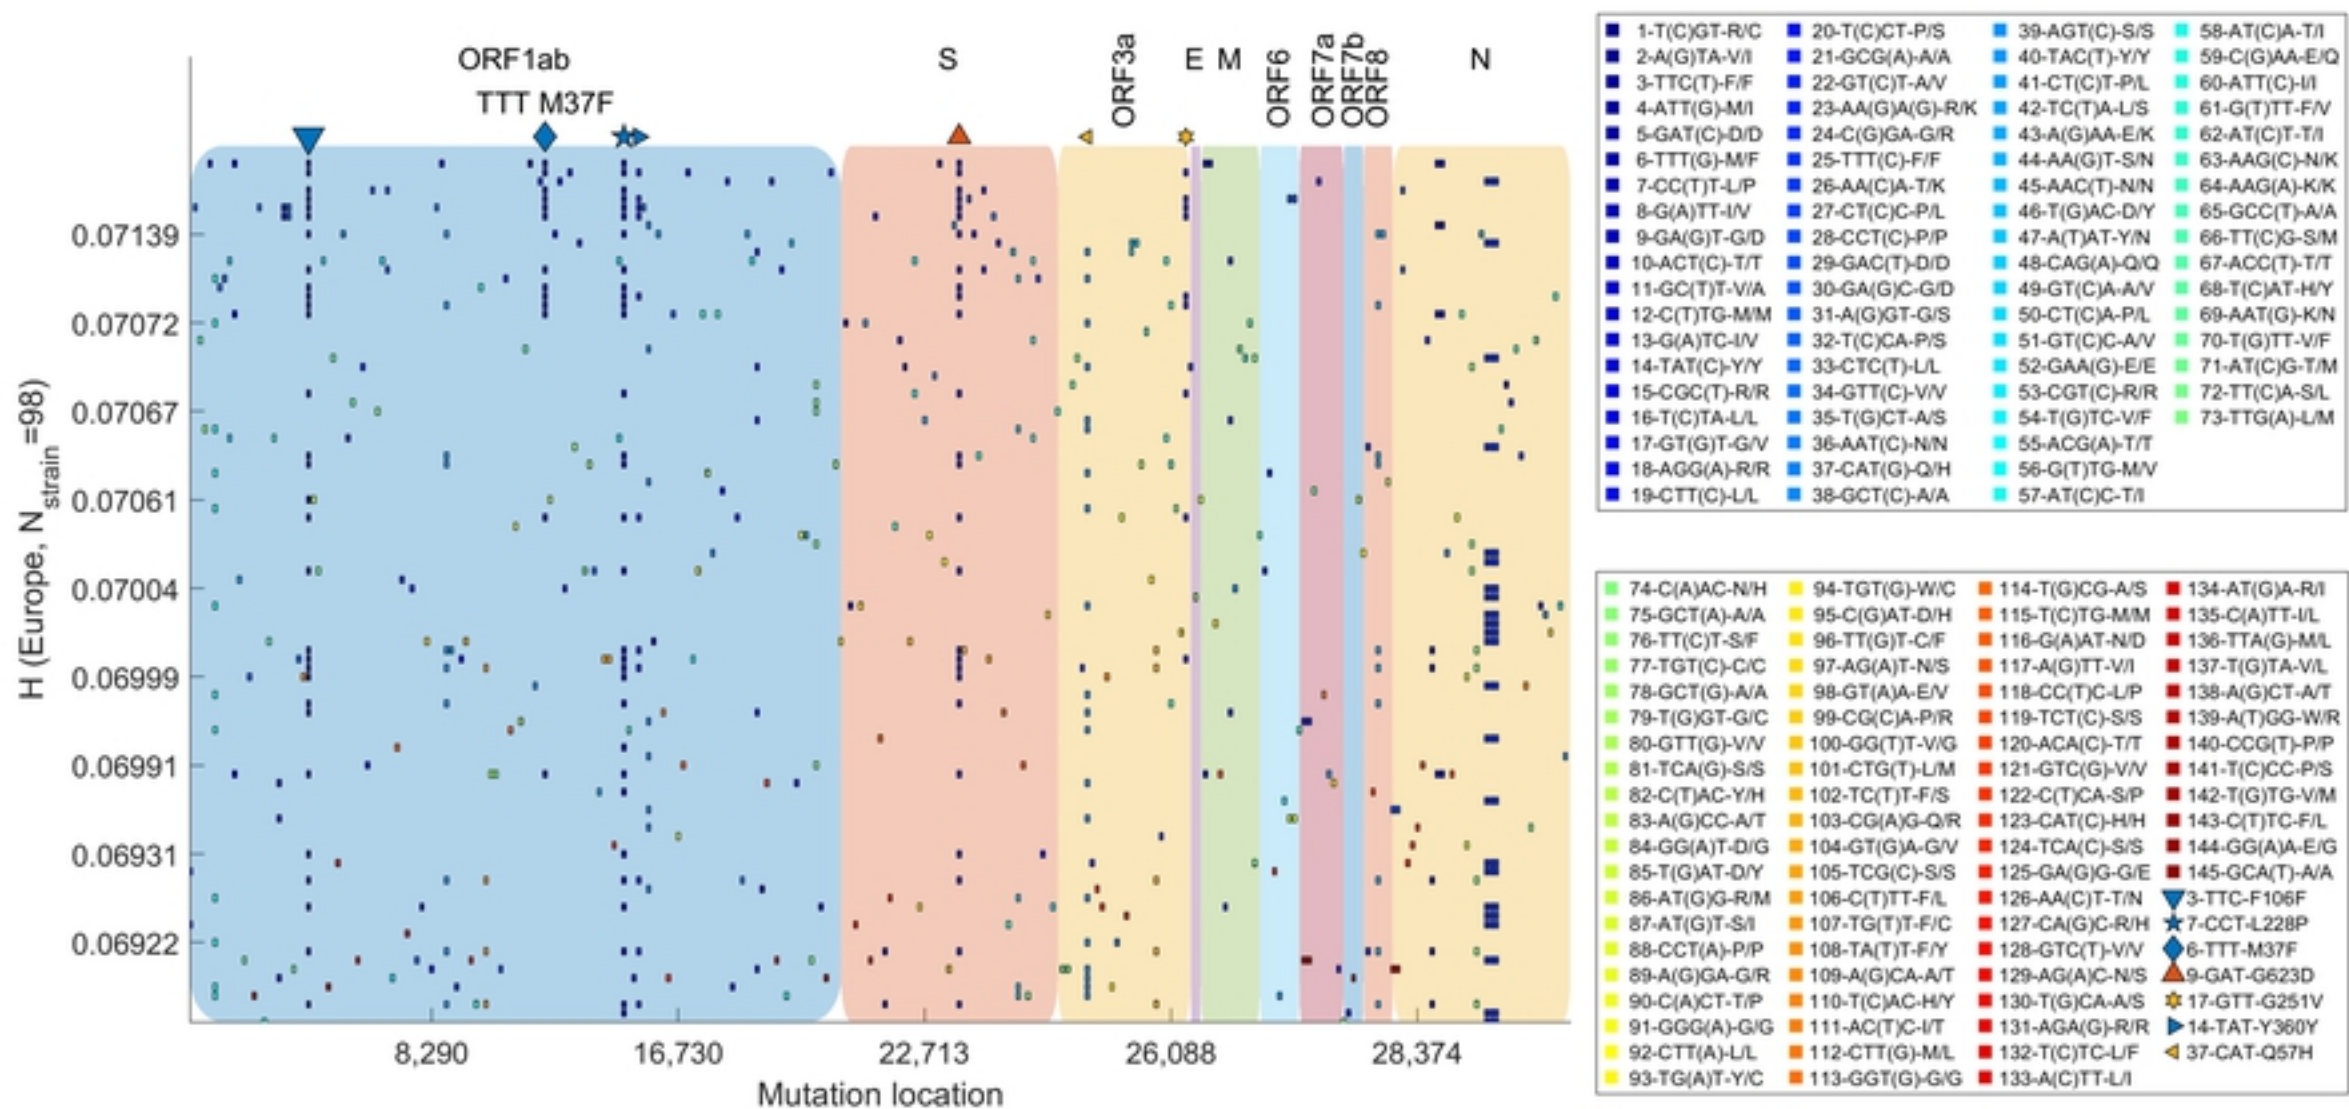

Fig9

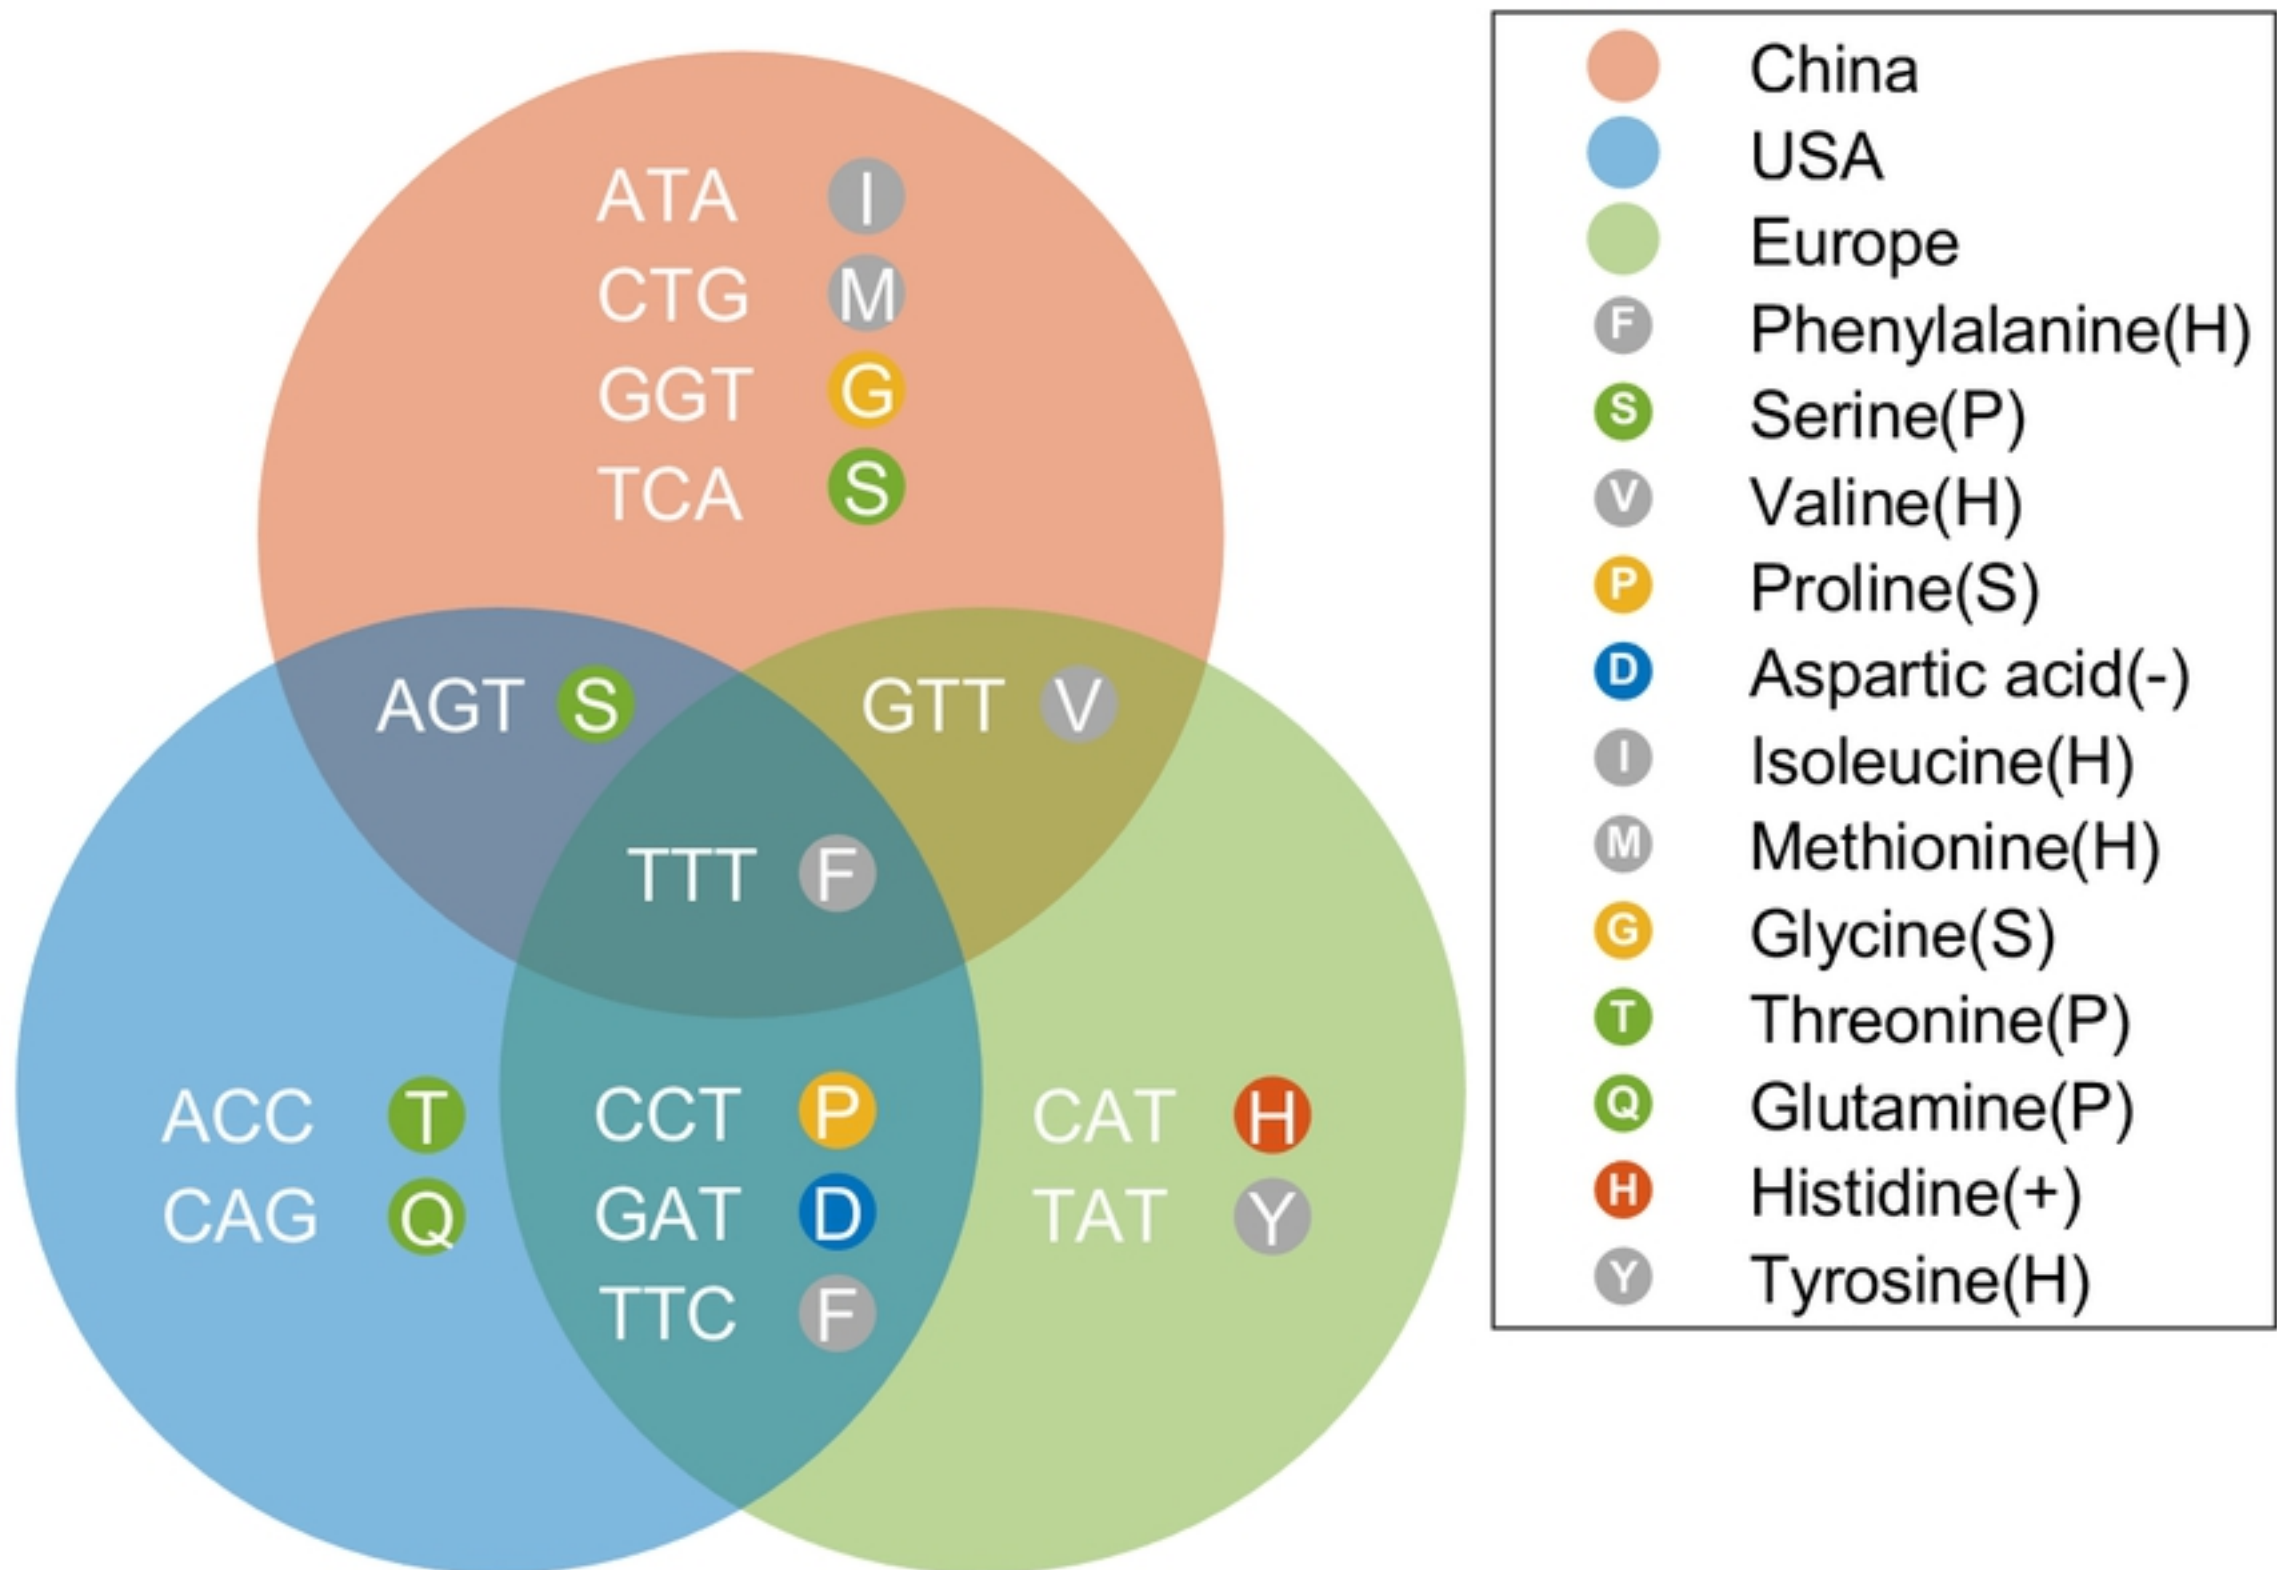

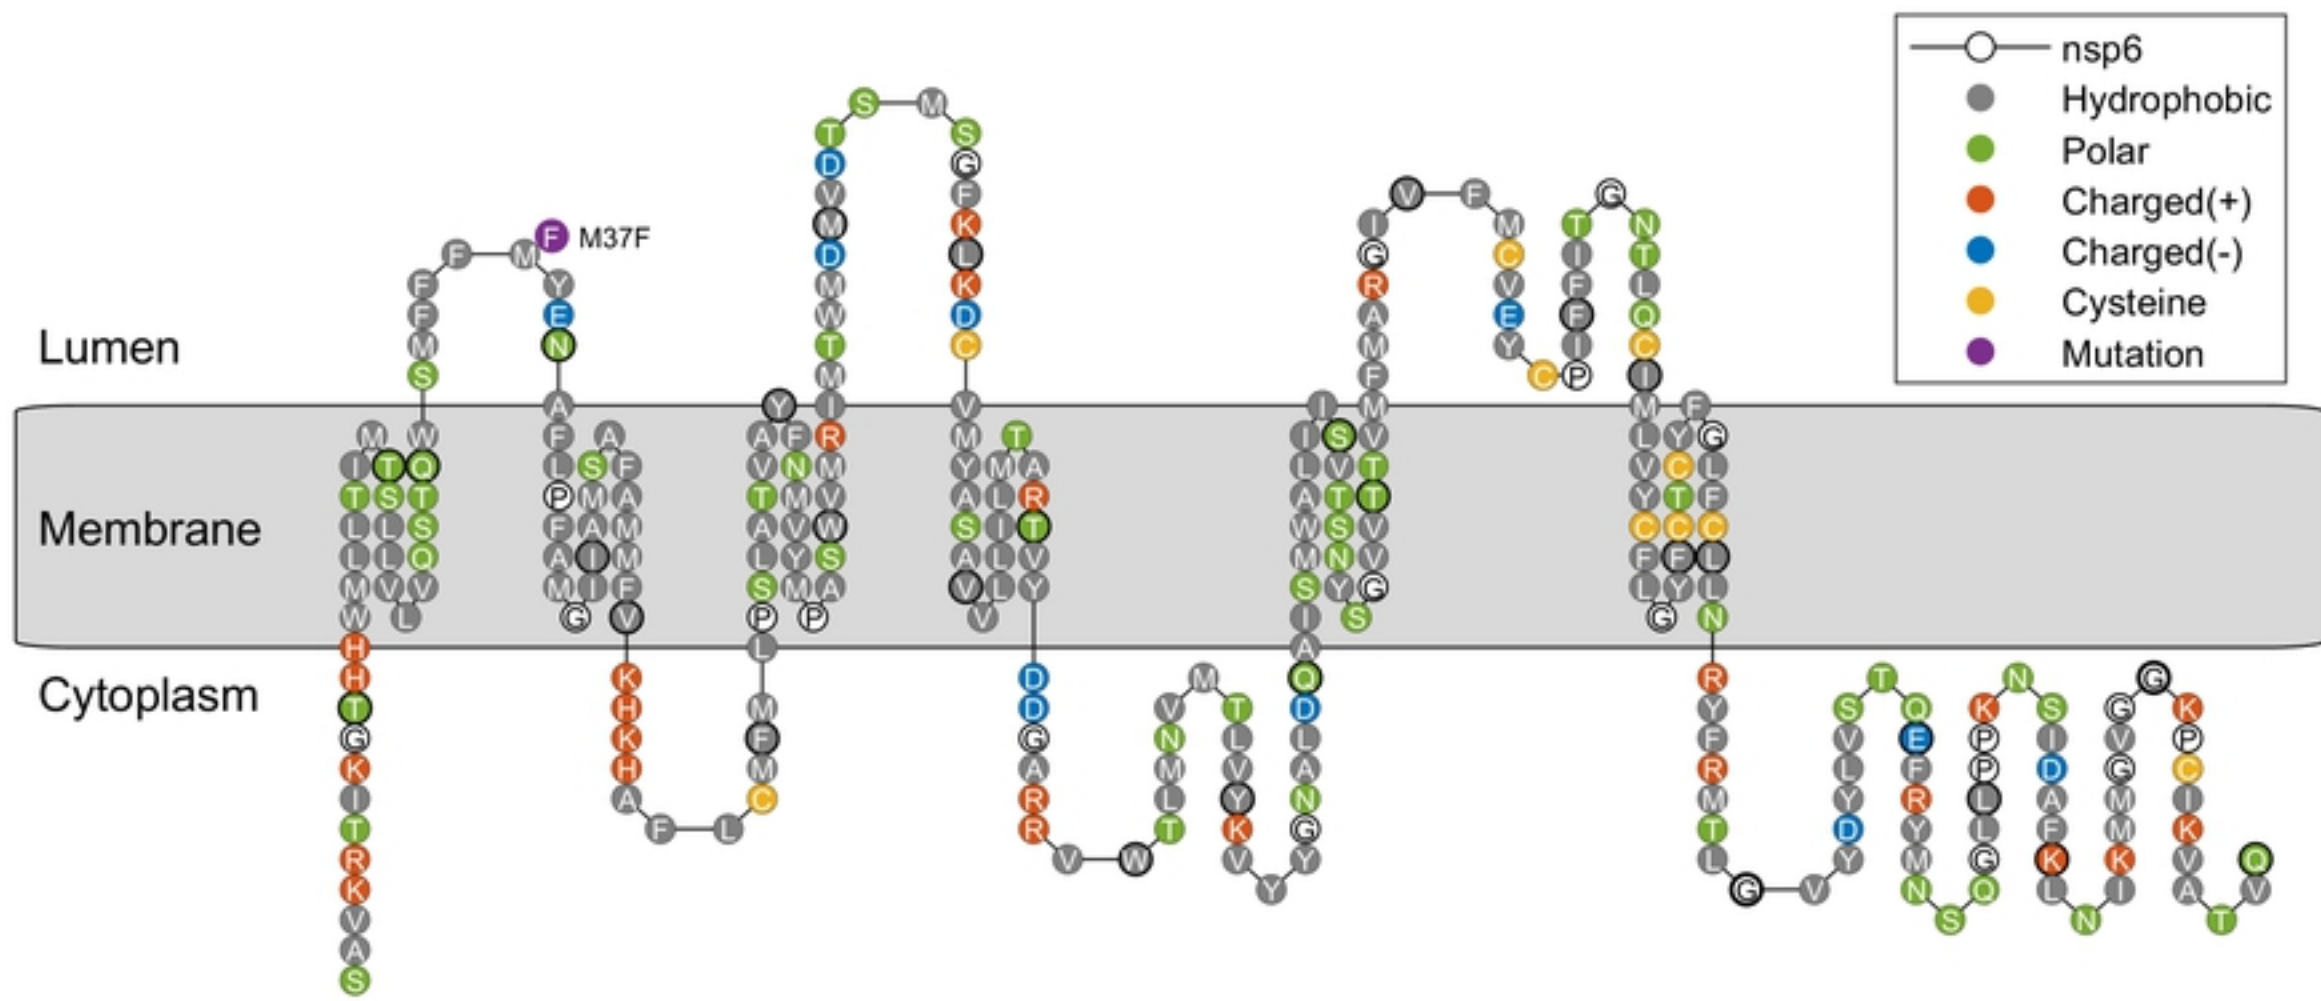

Fig11
